1  
2  
3  
4  
5  
6  
7  
8  
9  
10  
11  
12  
13  
14  
15  
16  
17  
18  
19  
20  
21  
22  
23  
24  
25  
26  
27  
28

## **PRC2-mediated repression is essential to maintain identity and function of differentiated dopaminergic and serotonergic neurons**

Konstantinos Toskas<sup>1</sup>, Behzad Yaghmaeian-Salmani<sup>1</sup>, Olga Skiteva<sup>2</sup>, Wojciech Paslawski<sup>3</sup>, Linda Gillberg<sup>1</sup>, Vasiliki Skara<sup>1</sup>, Irene Antoniou<sup>1</sup>, Erik Södersten<sup>1</sup>, Per Svenningsson<sup>3</sup>, Karima Chergui<sup>2</sup>, Markus Ringnér<sup>4</sup>, Thomas Perlmann<sup>1</sup> and Johan Holmberg<sup>1, 5\*</sup>

<sup>1</sup>Department of Cell and Molecular Biology, Karolinska Institutet, Solnavägen 9, SE-171 65 Stockholm, Sweden

<sup>2</sup>Department of Physiology and Pharmacology, Karolinska Institutet, BioClinicum J5:20 Neuro, Visionsgatan 4, 171 64 Solna, Sweden

<sup>3</sup>Department of Clinical Neuroscience, Karolinska Institutet, SE-17165, Stockholm, Sweden

<sup>4</sup>Department of Biology, National Bioinformatics Infrastructure Sweden, Science for Life Laboratory, Lund University, Sölvegatan 35, SE-223 62 Lund, Sweden.

<sup>5</sup>Department of Molecular Biology, Umeå University, SE-901 87, Umeå, Sweden

\*Corresponding author: Johan Holmberg, ([johan.holmberg@ki.se](mailto:johan.holmberg@ki.se))

29 **Abstract**

30 How neurons in the CNS can maintain cellular identity over an entire lifespan remains largely  
31 unknown. Here we show that long-term maintenance of identity in differentiated dopaminergic and  
32 serotonergic neurons is critically reliant on the Polycomb repressive complex 2 (PRC2). Deletion of the  
33 obligate PRC2-component, *Eed*, in these neurons, resulted in global loss of H3K27me3, followed by a  
34 gradual activation of genes harbouring both H3K27me3 and H3K9me3 modifications. Notably,  
35 H3K9me3 was also lost at these PRC2-targets prior to gene activation. Neuronal survival was not  
36 compromised, instead there was a reduction in subtype specific gene expression as well as a  
37 progressive impairment of dopaminergic or serotonergic neuronal function leading to behavioural  
38 deficits characteristic of Parkinson's disease (PD) or mood disorders, respectively. Single cell analysis  
39 revealed an unexpected subtype specific vulnerability to loss of PRC2-repression in dopamine neurons  
40 of the substantia nigra, the neurons primarily affected in PD. Taken together, our study reveals that a  
41 PRC2-dependent non-permissive chromatin state is essential to maintain subtype identity and  
42 function of dopaminergic and serotonergic neurons.

43

44

45

46

47

48

49

50

51

## 52 **Introduction**

53 The brain contains a large number of different neuronal subtypes that maintain their distinct cellular  
54 identities over several decades despite continuous environmental fluctuation. Apart from the  
55 instructive information provided by transcription factors controlling cell type-specific gene programs,  
56 there is also a need to maintain silencing of transcriptional programs governing other cellular fates (1,  
57 2). The mechanisms governing permanent repression of aberrant transcription in mature neurons are  
58 not well understood. Within this context, it is key to understand mechanisms regulating chromatin  
59 structure, e.g., dynamic modification of histones and how this is coupled to changes in gene  
60 expression. A prominent example of how chromatin associated gene silencing contributes to  
61 maintained cellular identity, is the sustained repression of *Hox* genes during segmentation of the  
62 *Drosophila melanogaster* embryo, which is dependent on polycomb group proteins (3). The Polycomb  
63 repressive complex 2 (PRC2) maintains established cell-type-specific gene repression through the  
64 deposition of the repressive histone modification H3K27me3 in promoter regions of silenced genes,  
65 thus facilitating chromatin compaction (4-6). PRC2 is required for proper differentiation during the  
66 development of the vertebrate CNS (7, 8), but whether PRC2 is an essential component for  
67 maintaining differentiated neuronal identity remains unclear. H3K27me3 is also found in domains  
68 which harbour the H3K4me3 modification associated with active transcription and these bivalent  
69 domains have been proposed to be silent but “poised” for rapid activation at a later developmental  
70 stage (9, 10). Thus, H3K4me3/H3K27me3 bivalency potentially represents a more relaxed chromatin  
71 state, amenable to rapid activation.

72

73 Efforts have been directed to understand how deviant gene regulation is involved in  
74 neurodegenerative and psychiatric disorders (11). The complex aetiology, often lacking a distinct and  
75 identifiable genetic component, of many of such pathological conditions suggests that alterations of  
76 the epigenome contributes to the disease (11). Changes in PRC2-activity and in H3K27me3 levels and

77 distribution have been associated with neurodegenerative disease (12-14) and mood disorders (15),  
78 however, if or how these processes contribute to disease remains poorly understood.

79

80 To understand fundamental molecular mechanisms underlying the role of gene repression for  
81 maintenance of neuronal identity and function, we have focused on the well-defined mDA- and 5HT-  
82 neuronal subpopulations as model systems. These monoaminergic neurons are involved in several  
83 psychiatric disorders and drug addiction. In addition, degeneration of mDA neurons in the Substantia  
84 nigra *pars compacta* (SNpc) is a hallmark of Parkinson's disease (PD) and dysregulated serotonergic  
85 function is causing depression, anxiety and contributes to L-DOPA dyskinesia in PD-patients (16).  
86 Hence, it is also relevant from a clinical perspective to understand basal mechanisms important for  
87 maintaining intact mDA and 5HT neuronal identity and function. Notably, in a preclinical model of PD,  
88 mDA neurons treated with the neurotoxin 6-OHDA exhibited substantial reduction in H3K27me3 levels  
89 (17). Besides the well-known toxic effects of 6-OHDA on mitochondria resulting in increased free  
90 radicals, this also couples exposure to PD-associated cellular stressors to the induction of a more  
91 relaxed chromatin state and potential de-repression of aberrant non-mDA genes. Furthermore,  
92 exposure to L-DOPA in a mouse model of PD leads to loss of Polycomb mediated repression (12). In  
93 differentiated medium spiny neurons, it has been shown that loss of PRC2 activity induced expression  
94 of cell death promoting genes which resulted in neuronal loss, leading to neurodegeneration (6). In  
95 these neurons de-repression primarily affected bivalent "poised" H3K4me3/H3K27me3 genes.

96

97 H3K9me3 is an additional histone modification involved in the establishment and maintenance of  
98 heterochromatin (18). Primarily associated with constitutive heterochromatin at centromeres and  
99 telomeres, H3K9me3 has also been shown to regulate facultative heterochromatin, provide an  
100 obstacle for cell reprogramming, and be required for establishment and maintenance of cellular  
101 identity (18, 19). Furthermore, H3K9me3 has been shown to be disrupted along with H3K27me3 upon  
102 6-OHDA treatment (17). In a recent study we generated global integrated maps of transcription and

103 histone modifications (H3K4me3, H3K27me3 and H3K9me3) of transitory as well as stable cellular  
104 states in mDA and 5HT neurons as well as their progenitors (20). This study also showed that in a  
105 mouse model of PD there was a significant enrichment of H3K27me3 targets among the upregulated  
106 genes implying a role for PRC2 in the transcriptional response to PD-associated cellular stressors.

107

108 To address the functional role of polycomb-mediated gene silencing for post-mitotic mDA- and 5HT-  
109 neuronal identity we have conditionally deleted the obligate PRC2-member *Eed*, which is necessary  
110 for PRC2 binding to H3K27me3 (21) and subsequent propagation of the modification, in both these  
111 neuronal subtypes. Taken together our study reveals a common logic in mDA- and 5HT-neurons  
112 wherein PRC2-activity is required for maintenance of subtype specific gene patterns and neuronal  
113 function, consequently loss of PRC2-function generates phenotypes which mirror key aspects of PD  
114 and mood disorders, without compromising neuronal survival. In addition, our single cell analysis  
115 reveals a specific vulnerability in mDA neurons of the SNpc to reduced H3K27me3 levels.

116

## 117 **Results**

### 118 **Conditional deletion of *Eed* in differentiated mDA neurons**

119 To address the role of PRC2 mediated repression in differentiated mDA neurons we generated a  
120 compound mouse mutant by crossing mice carrying floxed alleles for a ribosomal protein fused to  
121 mCherry (*Rpl10a-mCherry*). The *Rpl10a-mCherry*<sup>fl<sup>ox</sup>/fl<sup>ox</sup></sup> mouse line was crossed with mice carrying a  
122 floxed *Eed* allele (22) and finally with *DatCre* (23) (Fig. 1A). This enabled deletion of *Eed* and expression  
123 of *mCherry* in post-mitotic mDA neurons under the control of *Dat* (*Slc6a3*) expression, which is first  
124 detected in midbrain at around embryonic day 13.5 (E13.5). In this study, the full compound mutants  
125 will be denominated *DatCreEed*<sup>fl<sup>fl</sup></sup>. Pups from the mutants were born at expected mendelian ratios  
126 and were indistinguishable from wild type littermates. Immunostaining of sections showed that the  
127 mCHERRY reporter colocalized with the rate limiting enzyme for dopamine synthesis, Tyrosine  
128 Hydroxylase (TH) in both the VTA and SNpc of both wild-type and mutant mice (Fig. 1B-E).

129

### 130 **Intact PRC2 function is required for long term maintenance of H3K27me3**

131 To understand if induction of *Cre* resulted in deletion of EED protein at birth we performed  
132 immunostaining of midbrains from newborn pups at day 0 (P0) with an antibody specific for EED. In  
133 *DatCreEed<sup>wt/wt</sup>* mice there was clear nuclear EED immunoreactivity in mCHERRY<sup>+</sup> mDA neurons (Fig.  
134 1F) whereas mCHERRY<sup>+</sup> cells in the *DatCreEed<sup>fl/fl</sup>* mutants exhibited lack of nuclear EED (Fig. 1G). To  
135 investigate whether the absence of EED protein in the mutants also resulted in loss of H3K27me3 we  
136 performed immunostaining with a H3K27me3 specific antibody. Although EED was lost in *DatCreEed<sup>fl/fl</sup>*  
137 H3K27me3 was retained (Fig. 1H-I), showing that the H3K27me3 modification is remarkably stable in  
138 post-mitotic mDA neurons. To further gauge if long term H3K27me3 stability depends on intact PRC2  
139 function we stained midbrain sections of juvenile mice, at P30, which revealed a virtually complete  
140 lack of H3K27me3 immunoreactivity in *DatCreEed<sup>fl/fl</sup>*-mice (Fig. 1J-K). Notably, immunoreactivity levels  
141 of TH were retained in both genotypes (Fig. 1L-M).

142

### 143 **Progressive activation of silent non-mDA PRC2 targets and repression of mDA identity genes**

144 To investigate the effects on global distribution of H3K27me3 and possible consequences of altered  
145 H3K27me3 levels for gene expression, we dissected out and prepared nuclei from dissected midbrains  
146 and used fluorescent activated cell sorting (FACS) to isolate mCHERRY<sup>+</sup> nuclei from *DatCreEed<sup>wt/wt</sup>* and  
147 *DatCreEed<sup>fl/fl</sup>*-mice at four and eight months of age. Sorted nuclei were collected in batches of 1000.  
148 Batches were used to generate chromatin immunoprecipitation (ChIP) libraries for H3K27me3 (K27)  
149 but also for the permissive modification H3K4me3 (K4) and the facultative heterochromatin  
150 associated modification H3K9me3 (K9). In addition, one batch per mouse brain was utilized to  
151 generate libraries for bulk RNAseq.

152

153 Initially we examined the presence of K27 in the promoter region  $\pm$  10 kb around transcription start  
154 sites (TSS) together with expression levels in wild type cells which revealed an inverse correlation (Fig.

155 2A). We then determined how distinct chromatin states in the same promoter region correlated with  
156 expression levels in wild type cells at four months as described in our previous study (20). The results  
157 show that among the eight possible different states, the genes containing K4 exhibit the highest  
158 expression levels. Conversely, chromatin states harbouring K27 and/or K9 without K4 exhibit the  
159 lowest levels of expression (Supplementary Fig. S1A).

160

161 We then investigated the consequences of *Eed* deletion for the distribution of K27, K4, and K9 at four  
162 and eight months. In four months mutant mDA neurons there was a substantial loss of K27, reducing  
163 the number of detected K27<sup>+</sup> genes by 75.3% (2973 in wild type compared to 735 in mutants) (Fig. 2B,  
164 Supplementary table 1). To understand the consequence of such a major loss of K27 for gene  
165 expression, we integrated the expression data with the chromatin analysis. Despite the substantial  
166 global loss of K27, only 102 genes were significantly upregulated (adj p<0.05) (Fig. 2C, Supplementary  
167 table 2) and of those 57 genes were K27 targets (Fig. 2C, Supplementary Table 2), a 4.7-fold  
168 enrichment (Fisher's exact test, p=5e-27) over the expected ratio. Out of the 57 upregulated K27  
169 targets, 22 were determined as lacking K27 at ±10kb of TSS, in mutant nuclei. The 35 upregulated  
170 genes that still were determined as K27<sup>+</sup>, do retain K27 around the TSS, albeit at reduced levels (e.g.,  
171 *Foxg1*, *Phox2b* and *Hand2*). Several quintessential PRC2 targets such as the *Hoxd* cluster, did not  
172 exhibit increased expression in the mutants. Despite a reduction in K27 enrichment in such genes, a  
173 significant proportion of the modification remained (Supplementary Fig. S1B), underscoring the  
174 resilience of this modification in mDA neurons lacking PRC2 activity. The upregulated genes exhibited  
175 strong enrichment of gene ontology (GO) categories associated with regulation of transcription and  
176 early developmental processes (GO Biological Process 2021, as calculated by Enrichr (24, 25)) (Fig. 2D).  
177 Concomitantly, loss of K27 also resulted in significant (adj p<0.05) downregulation of 28 genes, with  
178 one of them (*Myo7a*) being a K27 target (Fig. 2C).

179

180   ChIPseq and RNAseq analysis in nuclei sorted from 8 months old animals also showed an inverse  
181   correlation between K27 and expression level in WT nuclei (Fig. 2E). Furthermore, it revealed a  
182   complete loss of genes determined as K27<sup>+</sup> in the *DatCreEed<sup>fl/fl</sup>* mutants (Fig. 2F, Supplementary Table  
183   1). This loss was accompanied by a minor but noticeable increase in K4 and loss of K9 (Fig. 2F).  
184   Inspection of differentially expressed genes showed that 654 genes were significantly upregulated  
185   (Fig. 2G), with 55 of them upregulated at 4 months and 242/654 carrying the K27 modification (Fig.  
186   2G, Supplementary Table 2), representing a 4.3-fold enrichment over expected (Fisher's exact test,  
187   p=5e-95). Upregulated PRC2-targets included several members of the *Hox*-family, transcription  
188   factors involved in determining other cell fates during development e.g., *Pitx1*, *Gata2* and *Foxd3*, stem  
189   cell factors such as *Pax6*, genes typically expressed in other neuronal types, e.g., *Gad1-2* and cell cycle  
190   regulators including *Ccnd1-2* and *Cdkn2a* (Supplementary table 2). In contrast to the four-month  
191   mutant mDA neurons, several members of the *Hoxd* clusters were upregulated at 8 months. This was  
192   reflected by acquisition of H3K4me3 combined with loss of K27 as well as K9 (Supplementary Fig. S1C).  
193   Moreover, in the 8-month-old mutant mDA neurons there were 756 significantly downregulated  
194   genes, with 32 of them carrying the K27 modification (Fig. 2G, Supplementary table 2), representing a  
195   two-fold reduction compared to what would be expected by chance (Fisher's exact test, p=7e-5).  
196   Among the downregulated genes several transcription factors critical for mDA neuronal function were  
197   present, e.g., *En1/2*, *Nr4a2* (*Nurr1*), *Lmo3*, *Pitx3* and *Pou3f2* (Supplementary table 2). Upregulated  
198   genes exhibited strong enrichment of GO-categories associated with regulation of transcription and  
199   early developmental processes, whereas downregulated genes were enriched for ventral midbrain  
200   categories (GO Biological Process 2021 and Allen Brain Atlas Up, as calculated by Enrichr) (Fig 2H).

201

202   **Combined H3K9me3/H3K27me3 is associated with higher probability of de-repression upon loss of**  
203   **PRC2 activity**

204   Inspection of the H3K27me3, H3K4me3 and H3K4me9 modifications  $\pm 10$  kb around the TSSs of the  
205   genes upregulated in the mutants, revealed a pronounced increase of K4 and loss of K9 (Fig. 2I). To



206 further understand whether any specific chromatin state in wild type mDA neurons would predispose  
207 for de-repression, we inspected the distribution of K4, K27, K4/K27, K9/K27 and K4/K9/K27 in wild  
208 type mDA nuclei and correlated them with the differentially expressed genes. Among the upregulated  
209 genes there was a significant enrichment in all states containing K27 but not in the K4-only, where  
210 there rather was a depletion (Fig. 2J-K). Closer inspection revealed that the most enriched chromatin  
211 states of upregulated genes in the mutants were those that contained both HK27me3 and HK9me3  
212 (K4/K9/K27 and K9/K27) in wild type cells. Compared to genes with a “poised”, bivalent K4/K27 state  
213 in the wild type, which had a 3.1x enrichment, the K9/K27 state exhibited 7.8x and the K4/K9/K27  
214 state 8.3x enrichment (Fig. 2K). In addition, when we compared the relative fold-change and statistical  
215 significance of the differentially expressed genes (DEGs) in the 8-months mutants, there was a clear  
216 difference between K4/K27 and K9/K27 genes, with K9/K27 genes generally exhibiting higher fold-  
217 increase and lower adjusted p-values (Fig. 2L). This was also true for the 4-months mutants  
218 (Supplementary Fig. S1D). To understand whether this difference was a consequence of K9/K27 genes  
219 being derepressed from absolute expression levels close to or equal to zero, we investigated the  
220 absolute expression levels of K4/K27 and K9/K27 genes in 8 months old wild type and mutants. This  
221 revealed that the wild type expression levels of K9/K27 genes were substantially lower than those of  
222 K4/K27 genes (Fig. 2M). However, the difference in absolute increase was significantly larger in the  
223 K9/K27 genes (Fig. 2N). Thus, this analysis revealed that presence of the additional heterochromatin  
224 modification K9 actually increases both the probability to activate repressed K27 genes as well as the  
225 magnitude of increased expression. Notably, GO analysis showed that K9/K27 genes are enriched for  
226 categories typically including regulation of transcription and early developmental events such  
227 embryonic organ morphogenesis, whereas K4/K27 genes includes GO categories associated with  
228 regulation of extracellular matrix, neuronal differentiation and proliferation (Supplementary Fig. S1E).  
229 The stronger enrichment of K9/K27 genes over K4/K27 genes prompted us to inspect the chromatin  
230 states at 4 months for genes that were upregulated at 8 months but not at 4 months. This analysis  
231 revealed that reduction of K9 occurs prior to de-repression of expression (Fig. 2O). Hence, the early

232 loss of K9 is not a mere consequence of activated transcription but rather coupled to the loss of K27  
233 at the same TSS. We have previously shown that early developmental regulators already silent and  
234 harbouring K27 in neural stem cells, gain K9 in differentiated mDA neurons (20) suggesting that both  
235 the acquisition and maintenance of K9 at these TSSs are closely connected and potentially dependent  
236 on PRC2 activity.

237

### 238 **Progressive loss of TH, dopamine and dopamine-associated metabolites upon loss of PRC2 activity**

239 To understand the phenotypic consequences of the progressive loss of K27 we stained for TH at 4 and  
240 8 months, both in the midbrain VTA/SNpc and in the striatal target region. At 4 months there was no  
241 apparent difference between wild type and mutant mice, neither in VTA/SNpc nor in striatum (Fig. 3A-  
242 B, G-H), suggesting that in the mutants the establishment of this circuitry during development is not  
243 perturbed. Reflecting the reduction of *Th* expression in 8-months mutants (Fig. 2G), there was a slight  
244 reduction of TH immunoreactivity in mutant midbrain (Fig. 3D, J). However, in the dorsal striatum of  
245 *DatCreEed<sup>fl/fl</sup>* mutants TH was completely lost while low levels of TH could still be detected in the  
246 nucleus accumbens (Fig. 3C, I). To investigate whether this loss of TH progressed over time, we  
247 performed staining of 16-months old mutants. At this time point also mCHERRY<sup>+</sup> cells in the SNpc  
248 displayed an almost complete loss of TH, whereas cells in the mutant VTA still exhibited substantial  
249 TH immunoreactivity (Fig. 3E-F, K-L). The loss of TH immunostaining in mutant mice at 8 months could  
250 be the result of a progressive loss of established projections from the SN/VTA to their striatal targets.  
251 To investigate this possibility, we performed intracranial injections targeting the SN/VTA with AAV-  
252 vectors (pCAG-FLEX-EGFP-WPRE virus (26)) to anterograde trace the projections from midbrain to  
253 striatum at 8 months. Three weeks post-injection we sacrificed the animals for analysis. Green  
254 fluorescent protein (GFP) was exclusively expressed from the mDA neurons expressing the  
255 recombinant protein CRE at the site of injection (Fig. 3N, 3P), as well as extending until their target  
256 area in the striatum (Fig. 3M, 3O). Despite, an almost total absence of TH immunoreactivity in mutant  
257 striatum there was a strong GFP signal in all mutants analysed (Fig. 3M-P). Hence, the projections from

258 midbrain to the striatal target area are largely intact in the *DatCreEed<sup>fl/fl</sup>*-mutants. Since it has been  
259 reported that *Ezh1/2* deletion in medium spiny neurons caused severe neuronal loss through cell  
260 death (6), we analysed and counted the mCHERRY<sup>+</sup> cells in representative areas of 8 months old  
261 midbrains but failed to detect any significant difference in the number of cells between *DatCreEed<sup>wt/wt</sup>*  
262 control mice and *DatCreEed<sup>fl/fl</sup>* mutants (Fig. 3Q-S). We next wanted to understand whether the  
263 reduced levels of TH affected levels of dopamine and associated metabolites. To investigate this, we  
264 dissected out midbrain and striatum and performed high performance liquid chromatography (HPLC)  
265 to measure metabolites of the dopamine synthesis pathway. In *DatCreEed<sup>fl/fl</sup>* mutants both regions  
266 displayed a significant reduction of dopamine, DOPAC and homovanillic acid (HVA), (Fig. 3T). The  
267 decrease was most prominent in the striatum, where mutant animals exhibited a more than fivefold  
268 reduction of all three metabolites compared with control animals (Fig. 3T).

269

#### 270 **Basic electrophysiological properties of mDA neurons are perturbed upon loss of PRC2 activity**

271 The reduction in dopamine and associated metabolites combined with the loss of TH  
272 immunoreactivity in the striatal target area suggest that, besides loss of identity, a severe perturbation  
273 of mDA-neuron function also occurred in *DatCreEed<sup>fl/fl</sup>*-mutants. To address this, we analysed basal  
274 physiological properties through whole cell patch-clamp recordings in slice preparations from the 8-  
275 month mutant and wild type SNpc. Several of the measured parameters were significantly perturbed  
276 in the mutant midbrains (Fig. 4A-M). Cell capacitance was reduced (Fig. 4A) whereas membrane  
277 resistance was slightly increased (Fig. 4B). This implies that mutant mDA neurons exhibit smaller  
278 surface area and reduced open channel activity, generating a higher input resistance. Spontaneous  
279 pacemaker spiking typical of mDA neurons exhibited no difference in frequency (Fig. 4C), but the  
280 pacemaker pattern was disturbed with significant loss of consistency of interspike intervals (Fig. 4D-  
281 E). The hyperpolarization-activated current  $I_h$ , mediated by hyperpolarization-activated cyclic  
282 nucleotide gated (HCN) channels, which contributes to mDA-neuronal pacemaker firing integrity, was  
283 reduced (Fig. 4F-G). Also, slow afterhyperpolarization current (AHC) generated by small-conductance

284  $\text{Ca}^{2+}$ -sensitive  $\text{K}^+$  channels, was reduced (Fig. 4J-M). Even though the action potential amplitude was  
285 unchanged the threshold was decreased, whereas afterhyperpolarization (AHP) amplitude was  
286 decreased (Fig. 4I-L). These anomalies of spontaneous firing in the mDA-neuron population combined  
287 with the low levels of dopamine in the striatum indeed suggest severe loss-of mDA-neuronal function.

288

### 289 **Progressive impairment of overall locomotor activity and fine motor movement in *Eed* mutants**

290 To test if reduced levels of TH and dopamine metabolites as well as altered electrophysiological  
291 properties would generate any behavioural consequences, we performed several behavioural tests to  
292 detect potential motor skill impairments in the mutant mice (27). Coordination, endurance and muscle  
293 strength were not affected in the mutants as shown by the rotarod and grip strength tests  
294 respectively. (Supplementary Fig. S2A-C). However, when analysed in the open field test, their overall  
295 locomotor activity exhibited progressive reduction with age as recorded from the total moved  
296 distance (Fig. 4M-O). In addition, the number of rearings was significantly reduced in the mutants (Fig.  
297 4P). When challenged by the pole test, assessing fine locomotor function, mutant mice underscored  
298 a significant delay in initiation of descent as well as frequent failure to climb down the pole by falling  
299 sideways (Fig. 4Q). Hence, the mutants exhibited deficits primarily in the initiation of voluntarily  
300 movement as seen in the open field test, number of rearings and pole test. Whereas, when exposed  
301 to a forced movement paradigm testing coordination and balance, such as the rotarod, the mutant  
302 mice performed on par with the wild type mice. Motor function has mainly been coupled to the SNpc,  
303 whereas reward and motivation processes to a larger degree involve the VTA (28). Therefore, we  
304 challenged the mice by conditioning them to cocaine and examined whether perturbation in the  
305 reward system of 8-months old mutant mice occurred. We conducted conditional place preference  
306 (CPP) for cocaine, where a weak CPP occurred in the wild type mice (Fig. 4R). The CPP in mutant mice  
307 was more distinct (Fig. 4R), however the difference in post-test CPP between wild type and mutant  
308 mice was not significant, indicating that response to cocaine conditioning was unaffected by genotype.  
309 To investigate whether the motor response to cocaine was affected in the mutants we also performed

310 an open field test after injection of 10mg/kg cocaine. In both wild type and mutant mice there was a  
311 substantial increase of movement compared to non-treated animals (Supplementary fig. S2D).  
312 However, there was no significant difference between cocaine-treated animals, with different  
313 genotypes (Supplementary fig. S2D). Thus, the capacity to respond to cocaine in the mutant is not  
314 impaired, implicating that this aspect of SNpc/VTA function is intact.

315

316 Taken together, the loss of *Eed* results in progressive loss of H3K27me3, leading to upregulation of  
317 Polycomb target genes and reduced expression of mDA neuronal genes. This loss of cellular identity  
318 severely disrupts mDA neuronal function at cellular level, ultimately altering the behaviour of  
319 *DatCreEed<sup>fl/fl</sup>*-mutants.

320

### 321 **Loss of PRC2-function in serotonergic neurons results in loss of cellular identity and function**

322 An earlier study reported that cell-specific loss of PRC2 function in striatal medium spiny neurons  
323 (MSNs) caused substantial cell death (6). As mentioned, a corresponding cell death was not noted in  
324 the mDA neurons of *DatCreEed<sup>fl/fl</sup>*-mutants. To understand if deletion of *Eed* can cause loss of neuronal  
325 identity without cellular loss also in a different neuronal population we crossed the *Rpl10a-*  
326 *mCherry<sup>fllox/fllox</sup>/Eed<sup>fllox/fllox</sup>* mice with *SertCre*-mice(29). In this *SertCreEed<sup>fl/fl</sup>*-mutant, *Eed* is selectively  
327 deleted in hindbrain serotonergic neurons (5HT-neurons) expressing the serotonin transporter *Slc6a4*  
328 (a.k.a. *Sert.*) (Fig. 5A). Expression of *Slc6a4* first occurs in the hindbrain at around E12.5 of the mouse  
329 embryo. As in mDA neurons, there was in P0 mCHERRY<sup>+</sup> 5HT-neurons a substantial reduction in EED  
330 immunoreactivity in the *SertCreEed<sup>fl/fl</sup>*-mutants, whereas levels of H3K27me3 remained as in  
331 *SertCreEed<sup>wt/wt</sup>* mice (Supplementary fig. S3A-D). At P40 the levels of H3K27me3 were not detectable  
332 in *SertCreEed<sup>fl/fl</sup>* mutant cells (Fig. 5B-C). To investigate possible consequences of *Eed* loss in 5HT-  
333 neurons we stained the hindbrains of wild type and mutants, with an antibody specific for the rate-  
334 limiting enzyme in serotonin synthesis, tryptophane hydroxylase 2 (TPH2). At four months of age the  
335 number of mCHERRY<sup>+</sup> cells in the *SertCreEed<sup>fl/fl</sup>* mutants was unaltered compared to the wild type mice

336 with a distinct overlap of TPH2 immunoreactivity and mCHERRY<sup>+</sup> fluorescence in both wild type and  
337 mutant animals (Fig 5D, G). In contrast, at 8- and 16-months, immunostaining revealed a major loss of  
338 TPH2 in *SertCreEed<sup>fl/fl</sup>* mutants, but no loss of mCHERRY<sup>+</sup>-cells (Fig. 5E-I).

339

340 We proceeded to perform RNA-seq analysis of sorted 5HT-nuclei at 4 months which revealed  
341 upregulation of 84 transcripts of which 36 were K27<sup>+</sup>, as previously determined (20). Twenty-six  
342 transcripts were downregulated, of which two were K27<sup>+</sup> (Supplementary Fig. S3E). Similar analysis of  
343 sorted 5HT-nuclei at 8 months revealed 124 upregulated genes of which 107 were K27<sup>+</sup> (Fig. 5J). As in  
344 the mutant mDA nuclei the upregulated genes were enriched for several members of the *Hox*-family,  
345 transcription factors involved in determining other cell fates during development e.g., *Gata6*, *Foxg1*  
346 and *Dlx1*, stem cell factors such as *Pax6*, genes typically expressed in other neuronal types, e.g., *Gad1*  
347 and cell cycle regulators including *Ccnd2* and *Cdkn2a* (Fig. 5J and Supplementary Table 3).  
348 Downregulated genes numbered 72 and included 5HT-specific genes such as *Slc6a4*, *Tph2* and *Htr1a*  
349 (Fig. 5J and Supplementary Table 3). Of these 72 genes, 11 were H3K27me3<sup>+</sup>, which does not  
350 constitute an enrichment (Fig. 5J). GO analysis of the differentially expressed genes showed that  
351 among upregulated genes, there was a strong enrichment of categories related to transcriptional  
352 activation and early developmental processes. For the downregulated genes there was an enrichment  
353 of dorsal raphe nucleus associated categories (GO Biological Process 2021 and Allen Brain Atlas Up, as  
354 calculated by Enrichr) (Fig. 5K). The substantial reduction of TPH2 in 8-month mutants caused a  
355 decrease in levels of serotonin (5-HT) and the serotonin associated metabolite (5-HIAA) both in the  
356 hindbrain and in the prefrontal cortex target area as measured by HPLC (Fig. 5L).

357

358 To understand whether loss of serotonergic identity was followed by altered behaviour, as seen in the  
359 *DatCreEed<sup>fl/fl</sup>* mutants, we investigated whether aspects of behaviour that depend on an intact 5HT-  
360 function were perturbed in the 5HT-mutants. To examine if loss of *Eed* evoked depressive behaviour,  
361 we subjected 8-month *SertCreEed<sup>wt/wt</sup>* and *SertCreEed<sup>fl/fl</sup>*-mice to the forced swim test. Notably, there

362 was no significant difference between wild-type and mutant mice for the time they spent swimming  
363 (Supplementary Fig. S3F). However, when subjected to the elevated plus maze (EPM) (30) the mutants  
364 spent significantly more time in the open arms and visited them more frequently (Fig 5M-P). This  
365 change in behaviour could be a consequence of hyperactivity or less anxiety, behavioural phenotypes  
366 which has previously been associated with deficient serotonin neurotransmission (31, 32).

367

### 368 **Activated PRC2 targets are enriched for H3K9me3 in 5HT-nuclei**

369 The strong enrichment of K27 targets among the upregulated genes is reminiscent of the effects of  
370 *Eed*-deletion in mDA neurons. Since the presence of the heterochromatin modification H3K9me3 was  
371 associated with a higher probability of de-repression and activated transcription in mutant mDA nuclei  
372 we assigned upregulated genes in the *SertCreEed<sup>fl/fl</sup>* nuclei to the same chromatin states by utilizing  
373 the data set we generated for wild type 5HT-neurons in our previous study (20). This analysis showed  
374 that also in mutant 5HT nuclei the presence of K9 in a chromatin state was associated with a higher  
375 probability to activate transcription than the presence of K4 (Fig. 5Q).

376

### 377 **Common enrichment of upregulated H3K9me3/H3K27me3 targets in mutant mDA- and 5HT-** 378 **neurons**

379 Since we noted that transcriptional response to loss of *Eed* included similar PRC2 targets in mDA and  
380 5HT neurons we compared the overlap of up-regulated genes at 8 months. Indeed, there was a large  
381 overlap of upregulated genes with 85 common transcripts out of 124 (5HT nuclei) and 654 (mDA  
382 nuclei) (Fig. 5R). This represents a more than 24-fold higher number than expected by chance ( $p < 2.2e-$   
383  $16$ , Fisher's exact test). Of these 85 transcripts, 83 were K27<sup>+</sup> PRC2 targets in 5HT neurons and 77 in  
384 mDA neurons, which represents a substantial enrichment in both cell types. In addition, the 85  
385 commonly upregulated targets were also strongly enriched for the K9/K27-state when compared to  
386 the "poised" K4/K27-state (Fig. 5S).

387

388 When comparing Erichr (24, 25) analysis between the upregulated genes in mDA and 5HT neurons the  
389 similarity is clear. In both neuronal cell-types there was a strong enrichment of early developmental  
390 regulators, e.g., *Hox*-genes (Fig. 2G, 5J). Furthermore, another similarity is that both types of neurons  
391 exhibit reduced expression of transcripts specific to their identity, e.g., *Th*, *Slc6a3*, *En1*, *Nr4a2* and  
392 *Pitx3* in the mDA neurons and *Tph2*, *Htr1a*, *Slc6a4* and *Htr5b* in 5HT-neurons (Fig. 2G, 5J). Notably, in  
393 both mutants substantially increased expression of genes previously described as “death promoting”  
394 (e.g., *Cdkn2a*, *Hoxa5*, *Wt1*) was evident (Supplementary Tables 2 & 3) but without inducing any cell  
395 death, which clearly distinguishes these neuronal subtypes from medium spiny neurons (6).

396

### 397 **Single nuclei expression analysis reveals SNpc specific vulnerability to loss of PRC2 activity**

398 The selective and progressive loss of TH in the SNpc at 8 and 16 months (Fig. 3) indicates that different  
399 mDA-neuron subtypes may respond differently to PRC2 deficiency. To explore whether the changes  
400 in gene expression upon loss of H3K27me3 is distinct between mDA-neuron subgroups, gene  
401 expression was analysed by single nuclei RNA sequencing (snRNAseq) of sorted mCHERRY<sup>+</sup> nuclei from  
402 the midbrain of 8-months old wild type and mutant mice. Following quality control, sequencing data  
403 from 1772 nuclei from wild-type brains and 3968 nuclei from mutant brains were obtained. Uniform  
404 Manifold Approximation and Projection (UMAP) plots of these nuclei revealed a considerable diversity  
405 of wild type and mutant nuclei (Fig. 6A) Expression of a pan-mDA-neuron signature (*Th*, *Slc6a3*, *Nr4a2*  
406 and *En1*) was evident in a substantial proportion of the nuclei (Fig. 6B). To further characterize the  
407 snRNAseq data, distinct identities were assigned to different UMAP clusters based on the expression  
408 of markers previously described in the literature (Fig. 6C, Supplementary Fig. S4A)(33). Nuclei lacking  
409 robust expression of the pan-mDA neuronal signature, potentially isolated along with mCHERRY<sup>+</sup> mDA  
410 neuron nuclei when sorting, were defined as astrocytes, oligodendrocytes (ODC) and non-mDA  
411 neurons based on typical neural cell markers. Based on the classification reported in reference 33, the  
412 six clusters which robustly expressed the mDA-neuronal signature were divided into: VTA1  
413 (*Calb1*<sup>+</sup>/*Otx2*<sup>+</sup>), VTA2 (*Calb1*<sup>+</sup>/*Otx2*<sup>-</sup>), VTA3 (*Gad2*<sup>+</sup>/*Otx2*<sup>-</sup>), SNpc/VTA (*Sox6*<sup>+</sup>/*Aldh1a*<sup>-</sup>), SNpc-WT



414 (>98.5% WT) and SNpc-KO (>98.6% KO) both groups *Sox6*<sup>+</sup>/*Aldh1a1*<sup>+</sup> (Fig. 6C). Interestingly, one mDA-  
415 neuron groups (SNpc-WT) was almost exclusively enriched for wild-type nuclei (>98.5%) while another  
416 group (SNpc-KO) was almost exclusively enriched (>98.6%) for nuclei from mutant mice. In contrast,  
417 wild-type and knockout nuclei were distributed in roughly equal proportions in all other groups (Fig.  
418 6A). SNpc-KO nuclei had diminished mDA neuron marker gene expression but did express *Sox6* and  
419 *Aldh1a1*, consistent with a relationship to SNpc mDA neurons. The expression of the SNpc markers  
420 *Sox6*, *Aldh1a1* and the VTA marker *Calb1* was distributed as shown in Supplementary Fig. S4B-C. Thus,  
421 these observations indicate a rather drastic influence on gene expression in SNpc neurons as  
422 compared to the other mDA neuron groups as a consequence of disrupted PRC2 function.

423  
424 Hierarchical clustering based on the 2000 most variable genes in all nuclei from the mDA neuron  
425 groups revealed that the SNpc-WT and SNpc-KO clusters grouped separately from the VTA1-3 and  
426 SNpc/VTA groups (Fig. 6D, Supplementary Fig. S4D). To understand whether loss of PRC2-mediated  
427 repression had selective effects in different mDA-neuron subgroups, the signature expression of the  
428 25 most upregulated genes in mutant nuclei were visualized in violin plots. This analysis revealed that  
429 the most profound increase occurred in the SNpc-KO vs. SNpc-WT groups (Fig. 6D, Supplementary Fig.  
430 S4E). We then generated a heatmap of all mDA-neuron groups based on the 205 differentially  
431 expressed transcripts between all mutant and wild type nuclei, of which 93 exhibited increased  
432 expression and 112 decreased expression. This revealed a block of genes that are strongly upregulated  
433 in the majority of SNpc-KO nuclei but only in subsets of nuclei in the VTA1-KO, VTA2-KO, VTA3-KO and  
434 SNpc/VTA-KO nuclei (Supplementary Fig. S4F). This group of genes was strongly enriched for PRC2  
435 targets and for genes also upregulated in the bulk RNA-seq at 8 months.

436  
437 To further understand the differential effects resulting from loss of PRC2 function, genes differentially  
438 expressed between wild type and mutant nuclei were analysed for each group separately. As  
439 expected, major effects on gene expression were only seen in mDA-neuron clusters derived from cells

440 in which PRC2 had been disrupted by targeted knockout of *Eed* while marginal effects were seen in  
441 non-mDA-neuron groups. Notably, the largest number of DEGs was seen in the SNpc group (Fig. 6E) in  
442 which 584 genes were differentially expressed when comparing SNpc-KO vs SNpc-WT. In contrast, only  
443 174 genes were differentially expressed when comparing wild type and mutant nuclei in the three VTA  
444 groups combined into one VTA group (Fig. 6F). The more substantial response to loss of PRC2 activity  
445 in the SNpc group was also reflected in the magnitude of increase or decrease in expression in  
446 common up- or downregulated genes between SNpc and VTA (Fig. 6G) and is also clearly illustrated  
447 by plotting highly upregulated genes, such as *Hoxd11*, in the UMAP plot (Fig. 6H). Moreover,  
448 expression of the mDA-neuron signature was more significantly reduced in the KO-nuclei of the SNpc  
449 group (Fig. 6I). Taken together, the greatest impact of *Eed* deletion occurred in the SNpc population  
450 which was also reflected by how TH immunoreactivity was substantially reduced in the SNpc at 8 and  
451 16 months but was largely intact in the VTA (Fig. 3C-L).

452

453 Comparison of DEGs between mutant and wild type nuclei in the combined VTA and the SNpc showed  
454 equal (Fig. 6J, Supplementary Fig. S4G), stronger (Fig. 6K, Supplementary Fig. S4H) or exclusive (Fig. 6I,  
455 Supplementary Fig. 4I) upregulation of PRC2-targets in the SNpc. The few genes that were more  
456 robustly induced in the VTA are not PRC2 targets. Instead, they are typically expressed at robust levels  
457 in wild type cells and harbour the H3K4me3 modification (Fig. 6M, Supplementary Fig. S4J). Expression  
458 of pan-neuronal genes was not decreased in any of the groups, *Rbfox3* was actually slightly increased  
459 in the SNpc-KO nuclei (Fig. 6N). Notably, expression of the SN subtype specific gene *Sox6* was not  
460 decreased in the SNpc-WT vs SNpc-KO subgroups whereas expression of the VTA specific *Calb1* gene  
461 was reduced in the mutant VTA cells (Fig. 6O, P). We also plotted the expression of the four genes that  
462 constituted the mDA-neuron signature utilized Fig. 6B and F (Supplementary Fig. S4K).

463

464 To understand whether genes with specific chromatin states were regulated equally between mutant  
465 and wild type nuclei in VTA and SNpc, we utilized the chromatin states generated from the bulk ChIP-

466 seq. As in the bulk RNA-seq, upregulated genes both in the VTA group and the SNpc group, were  
467 strongly enriched for the K9/K27 chromatin state (VTA: 8.3x increase over expected,  $p < 4.2 \times 10^{-12}$ , SNpc:  
468 4.3x increase over expected,  $p < 1.4 \times 10^{-13}$ , Fisher's exact test). In contrast, in the SNpc-group there was  
469 no significant enrichment of K4/K27 genes and in the VTA group the enrichment was less (2.9x increase  
470 over expected,  $p < 0.0015$ , Fisher's exact test) than for the K9/K27 state (Supplementary fig. S4L).

471

## 472 **Discussion**

473 How long-term maintenance of cellular identity is coupled to permanent silencing of alternative  
474 lineages is largely unknown. This question is of particular interest for CNS neurons since their  
475 functional integrity and identity need to be maintained for several decades in the human brain. Our  
476 study reveals that in two well characterized neuronal populations of high clinical relevance, intact  
477 PRC2 function is essential for repression of aberrant gene expression as well as for the maintenance  
478 of cell type specific gene expression, but not for neuronal survival. Even though PRC2-mediated gene  
479 silencing has previously been shown to be required for proper neurogenesis in the neocortex (7, 34),  
480 the role of PRC2 in differentiated post-mitotic cells, such as neurons, is not understood. A previous  
481 report showed that in MSN and Purkinje cells, PRC2 is required to maintain silencing of death  
482 promoting genes (6). Similar "death-promoting" genes were upregulated in mutant mDA and 5HT  
483 neurons upon loss of PRC2 activity. However, there was no reduction in cell numbers, neither in mDA  
484 nor in 5HT neurons, even across an extended timespan (up to 16 months). Instead, there was a  
485 profound reduction in expression of subclass specific genes in both types of neurons. This is in contrast  
486 to a study wherein the methyltransferase *Ezh2*, another member of the PRC2 complex, was deleted  
487 in post-mitotic mDA neurons (35). Notably, deletion of *Ezh2* resulted in a selective and progressive  
488 loss of VTA neurons. Since the levels of K27 were not changed in the mutants, it is possible that this  
489 effect was uncoupled from the canonical methyltransferase function of *Ezh2*. In addition, in  
490 differentiated mDA neurons the expression level of *Ezh2* is lower than that of *Ezh1*, which also  
491 harbours methyltransferase capacity and thus could act as a redundant factor.

492

493 Since a majority of downregulated genes are not H3K27me3<sup>+</sup> in the wild type cells and the main  
494 function of PRC2 is to maintain repression, the reduced expression is most likely an indirect effect of  
495 *Eed*-deletion. A similar effect was reported in MSNs and in differentiated  $\beta$ -cells wherein cell type  
496 specific genes were downregulated upon loss of PRC2-activity (6, 36). Utilizing the single-nuclei data  
497 set, we have tried to identify crucial upregulated factors that repeatedly correspond with a decrease  
498 in mDA-neuronal identity genes. However, we could not couple any single upregulated factor with the  
499 decrease in mDA identity genes. This would argue for a combined effect of several upregulated factors,  
500 which, during development harbour the capacity to induce other cell lineages as well as to silence the  
501 mDA or 5HT neuronal lineages.

502

503 Since neurons are post-mitotic, the progressive reduction of K27 in mutant neurons is not the result  
504 of failure to establish novel K27 marks during cell division. Previous reports that histone turnover in  
505 the rodent brain occurs at an extended time scale (~220 days) (37) have recently been contrasted by  
506 studies showing that the histone variant H3.3 exhibit rapid and continuous turnover in differentiated  
507 CNS-neurons (38). Thus, the loss of K27 evident in the mDA and 5HT neurons likely is a consequence  
508 of combination of histone turnover and demethylase activity by *Kdm6a* and *Kdm6b*, both of which are  
509 expressed in mDA and 5HTneurons.

510

511 It has previously been proposed that the primary role for PRC2 in differentiated cells is to suppress  
512 transcription of bivalent K4/K27 genes (6, 39). Indeed, in both mDA and 5HT neurons there was an  
513 enrichment of K4/K27 bivalent genes among upregulated transcripts. However, presence of K9/K27  
514 was associated with a higher probability of de-repression as well as a higher increase in both relative  
515 and absolute expression levels. This preference for activating K9/K27 genes over K4/K27 genes poses  
516 several questions. Is this a cell specific feature? What does it reveal about potential interactions  
517 between K9 and K27 associated factors, as well as how these modifications are interpreted by the

518 transcriptional machinery? GO analysis of K9/K27 genes in 8month *DatCreEed<sup>wt/wt</sup>* mCHERRY<sup>+</sup> nuclei  
519 clearly shows strong enrichment of categories such as regulation of transcription and early  
520 developmental categories, for example anterior/posterior pattern specification. K4/K27 genes on the  
521 other hand are more enriched for categories such as extracellular matrix organization, proliferation  
522 control and neuronal differentiation (Supplementary Fig. S1E). Notably, the categories enriched for  
523 the K4/K27 state reflects transitions from K4 state in neural progenitor cells (NPC) to K4/K27 state in  
524 mDA neurons as determined in our previous study (20). Similarly, the categories enriched for the  
525 K9/K27 state is reminiscent of silent genes carrying K27 already in NPCs but which gain K9 to become  
526 K9/K27 in mDA neurons. Thus, after terminal differentiation K9 appears to be gained as an additional  
527 layer of repression, hence the higher probability of de-repression of K9/K27 genes is an unexpected  
528 result. Especially, since in differentiated MSNs loss of PRC2 activity led to activation of predominantly  
529 poised K4/K27 genes (6). However, in that study, no analysis of K9 was performed, inactivation of PRC2  
530 was achieved by targeting other components of the complex and a different Cre-promotor was used.  
531 Hence, differences could be due to different cell types, or the system used to delete PRC2 activity,  
532 which makes any direct comparison difficult. Interestingly, a recent study questions the whole concept  
533 of bivalency implicating that the combined presence of K4 and K27 does not represent a poised state  
534 (40). Indeed, our data showing that the K9/K27 state is a better predictor of de-repression than K4/K27  
535 would reflect that K4/K27 does not represent a poised state wherein activation of transcription has a  
536 high probability to occur after loss of K27. However, further studies are required to solve this question.  
537  
538 De-repression of K9/K27-genes results in a more substantial absolute increase in expression when  
539 compared to K4/K27-genes. Given that the K9/K27-genes have nearly undetectable expression levels  
540 and the K4/K27-genes have substantially higher expression levels in the wild type cells the identified  
541 K9/K27 likely represent true K9/K27 promoters. The loss of K9 precedes the upregulation of  
542 expression, which implies that the loss of K9 is not a mere consequence of increased expression upon  
543 loss of K27. Rather, this suggests that presence of K9 at K27<sup>+</sup> promoters is coupled to intact PRC2-

544 function, alternatively intact K27 distribution. How loss of PRC2 activity and/or K27 promotes loss of  
545 K9 is not clear. It has previously been shown that PRC2 and K27 cooperate with K9 to maintain the K9  
546 associated heterochromatin protein 1 $\alpha$  (41). A more direct link between K27 and K9 has been  
547 reported for telomeric heterochromatin assembly, wherein PRC2 and K27 are essential for K9 as well  
548 (42). In differentiated mouse embryonic stem cells K9 is dependent on intact SUZ12 function (43).

549

550 The selective vulnerability to loss of PRC2 activity in mDA neurons of the SNpc is reminiscent of how  
551 the same cells are hypersensitive in the response to cellular stressors such as 6-OHDA. Thus, loss of  
552 identity upon deletion of *Eed* is mirrored by cell death upon increased cellular stress. Both vulnerability  
553 to cellular stressors as well as mouse genetic models of PD have been coupled to diverse processes  
554 such as mitochondrial dysfunction, inflammation, and protein misfolding, whereas the phenotype we  
555 report here is the consequence of dysregulation of transcriptional processes. Notably, the  
556 electrophysiological alterations of the *DatCreEed<sup>fl/fl</sup>* mutants are reminiscent of age dependent decline  
557 of similar parameters in the MitoPark mouse (44), whereas progressive loss of TH in the SNpc and  
558 progressive development of motor deficits mirror key aspects of PD. Thus, the more significant impact  
559 of loss of PRC2 function in SNpc mDA neurons shows that these cells harbour an additional selective  
560 vulnerability in addition to the death promoting effects of cellular stressors, inflammation and  $\alpha$ -  
561 synuclein overexpression previously described. Whether this dual vulnerability is mechanistically  
562 coupled, remains to be addressed.

563

564 Expression of the homeobox gene *Engrailed1* (*En1*), which is a key survival factor for mDA neurons  
565 (45), is reduced in both the mutant SNpc and VTA (Supplementary Fig S4K). It has previously been  
566 showed that there is a pronounced reduction of K27 in mDA neurons of *En<sup>+/-</sup>* mice (17). Furthermore,  
567 in the same study *En1<sup>+/-</sup>* mutant exhibited heightened sensitivity to 6-OHDA treatment and reduced  
568 expression of both *Ezh1* and *Ezh2*. Hence, it appears that there is a link between *En1* and levels of K27,  
569 wherein *En1* facilitates expression of *Ezh1* and *Ezh2*, thus helping to maintain K27 levels. Reciprocally,

570 inhibition of PRC2 function in turn potentially leads to the upregulation of factors capable of  
571 repressing expression of *En1*. Given the fundamental role for *En1* in the maintenance of mDA neurons  
572 it is possible that the loss of mDA neuronal traits is closely coupled to the reduced levels of *En1* in the  
573 mutants.

574

575 Taken together, our study elucidates how an epigenetic mechanism controls permanent gene  
576 silencing and maintenance of serotonergic and dopaminergic identity. It also reveals how loss of such  
577 epigenetic control does not compromise neuronal survival but leads to loss of subtype-specific  
578 function and to phenotypes that recapitulates symptoms characteristic of PD and mood disorders,  
579 providing a deeper understanding of how epigenetic mechanisms could contribute to the aetiology of  
580 these multifactorial diseases.

581

## 582 **Acknowledgements**

583 Support was provided by The Knut and Alice Wallenberg Foundation (grant 2013.0075 to J.H., T.P.,  
584 P.S. and K.C.), The Swedish Research Council (VR 2016-02536 to J.H.; VR 2016-02506 and VR 2020-  
585 00884 to T.P.), The Swedish Brain Foundation (to J.H. and T.P.) and Torsten Söderbergs Stiftelse (T.P.).  
586 M.R. was financially supported by the Knut and Alice Wallenberg Foundation as part of the National  
587 Bioinformatics Infrastructure Sweden at SciLifeLab. The computations were enabled by resources in  
588 project SNIC 2021/23-184 provided by the Swedish National Infrastructure for Computing (SNIC) at  
589 UPPMAX, partially funded by the Swedish Research Council through grant agreement no. 2018-05973.

590

## 591 **Data Availability**

592 The data sets generated and analyzed during the current study are available in the GEO repository  
593 with accession number GSE189018.

594

595 **Materials and Methods**

596 **Ethical considerations**

597 All animal experiments were performed according to Swedish guidelines and regulations, the ethical  
598 permits N189/15 and 6259-2020 was granted by “Stockholms Norra djurförsöksetiska nämnd,  
599 Sweden”.

600 **Mice**

601 The generation of *DatCre*, *SertCre* (23, 29), *Rpl10 $\alpha$ -mCherry*(46) and *Eed<sup>fl/fl</sup>* (22) mice has been  
602 previously described. Mouse lines were crossed and generated the *DatCreEed<sup>fl/fl</sup>Rpl10 $\alpha$ -mCherry* and  
603 the *SertCreEed<sup>fl/fl</sup>Rpl10 $\alpha$ -mCherry* lines used in our study. Mice were kept in ventilated cages with  
604 controlled 12 h light/dark cycles, temperature and humidity with water and food provided ad libitum.  
605 Mice were housed at a maximum number of four males or six females per cage. Both genders were  
606 represented in similar numbers for different type of experiments.

607 **Histological analyses**

608 Animals were deeply anesthetized with Avertin intraperitoneal sodium pentobarbital (Apoteksbolaget  
609 AB) and perfused with room-temperature phosphate buffer saline through the ascending aorta,  
610 followed by ice-cold 4% paraformaldehyde. The brains were subsequently removed, postfixed in the  
611 same fixative for 16-18 h and cryoprotected for 24-48 h in 30% sucrose at 4°C, before being cut on a  
612 Leica microtome at 30  $\mu$ m thickness. Sections were permeabilized in 5% BSA in PBS-Tx100 (PBS with  
613 0.5% Triton-X100), followed by primary antibody incubation at 4°C for 16-18 h using sheep anti-TH  
614 (1:1000, cat# P60101-150, Pel-Freeze), anti-TPH2 (1:500, cat# T0678, Sigma), anti-H3K27me3 (1:500,  
615 cat# 9733, CST), anti-EED (1:500, cat# 85322, CST). Fluorescent detection was done with an Alexa-  
616 tagged secondary antibody from Molecular Probes, donkey anti-sheep (1:500, cat# A21448), goat anti-  
617 mouse (1:500, cat# A21151), donkey anti-rabbit (1:500, cat# A21206). Section images were obtained  
618 in confocal microscope LSM-700 from Zeiss



619 **Tissue processing for imaging and cell counting**

620 Mouse brains were cleared using the CUBIC protocol (47) with minor modifications (48). In brief, mice  
621 were perfused with 4% paraformaldehyde and after post fixation, brains were washed in phosphate  
622 buffer (PB 0.1M, pH7.6-7.8) at 4°C for 24h. Brains were cut in 1mm slices using a brain matrix. 1 mm  
623 slices were incubated in CUBIC reagent 1 (25% urea, 25% N,N,N',N'-tetrakis-(2-  
624 hydroxypropyl)ethylenediamine and 15% Triton X-100) at 37 °C for 2 days. Slices were transferred to  
625 fresh Cubic reagent 1 and incubated for further 24h at 37°C, before washing in PB (0.1 M) for 8 h at  
626 room temperature (8 x 1 h shaking). Tissue was incubated in blocking solution (5% BSA) for 24 h at  
627 37°C and switched to anti-MCHERRY (1:5000, cat# AB0040-200, SICGEN) for 2 days at 37°C. After  
628 washing in PB (0.1 M) for 8 h at room temperature (8x 1h shaking), slices were incubated in Alexa 555,  
629 donkey anti-goat (1:500, cat# A21432, Invitrogen) for 24 h at 37°C and washed for 8h (8 x 1 h shaking)  
630 with PB (0.1 M) at room temperature. Slices were afterwards incubated in Cubic reagent 2 (50%  
631 sucrose, 25% urea, 10% 2,2',2''-nitrilotriethanol, and 0.1% Triton X-100) while shaking for 16-18 h at  
632 37°C. Tissue slices were placed in 1mm height chambers on a glass slide and imaged in Cubic reagent  
633 2 in confocal microscope LSM-700 from Zeiss. Acquired images were analyzed with Imaris Cell Imaging  
634 software and cell bodies of mCHERRY positive cells were counted.

635 **FACS sorting of cell-type-specific nuclei**

636 *DatCreEed<sup>fl/fl</sup>-Rpl10 $\alpha$ -mCherry* and *SertCreEed<sup>fl/fl</sup>-Rpl10 $\alpha$ -mCherry* mice were sacrificed with CO<sub>2</sub> and  
637 brains were rapidly removed and transferred into cold PBS. The midbrain and hindbrain respectively,  
638 were dissected under fluorescent stereoscope and snap-frozen in dry ice. Tissue was thawed and  
639 dissociated using a 1 ml dounce homogenizer (Wheaton) in ice-cold lysis buffer (0.32M sucrose, 5nM  
640 CaCl<sub>2</sub>, 3 mM MgAc, 0.1 mM Na<sub>2</sub>EDTA, 10 mM Tris-HCl, pH 8.0, 1 mM DTT, 1x complete proteinase  
641 inhibitor, EDTA-free (Roche). The homogenate was centrifuged for 5min at 500 x *g* and the pelleted  
642 nuclei were resuspended in a nuclear storage buffer (15% sucrose, 10 mM Tris\_HCl, pH 7.2, 70 mM  
643 KCl, 2 mM MgCl<sub>2</sub>) supplemented with RNase inhibitor (RNase out, Invitrogen) and Proteinase inhibitor  
644 (Complete, Roche). When nuclei were used for 10x Genomics single cell RNA-seq, pelleted nuclei were

645 instead resuspended in 2% BSA with RNase inhibitor. Re-suspended nuclei were filtered through a  
646 30µm cup falcon (BD Biosciences, 340625) into a BSA-coated tube for sorting. Nuclei were stained  
647 with DAPI for 30 min prior to sorting.

648 FACS was performed using FACSAria Fusion cell sorter and the FACSDiva software (BD Biosciences).  
649 The nuclei were identified by forward- and side- scatter gating, a 561 nm laser with a 610/20 filter and  
650 a 405 nm laser with a 450/50 filter, quantifying DNA content per event to assure that only singlets  
651 were collected. A 100 µm nozzle, sheath pressure of 20-25 psi, and an acquisition rate of up to 1000  
652 events per second were used. Cell type-specific nuclei were collected in batches of 1000,  
653 supplemented with a nuclear pellet buffer (10 mM Tris (pH 8.0), 100 mM NaCl, 2 mM MgCl<sub>2</sub>, 0.3 M  
654 sucrose, and 0.25% IGEPAL CA-630) to a volume of 10µl when used for bulk RNA-seq or ChIP-seq,  
655 whereas for 10x Genomics single cell RNA-seq, nuclei were preserved in 2% BSA until downstream  
656 procedure.

#### 657 **Bulk RNA-sequencing and analysis**

658 Sequencing libraries were generated from total RNA of 1000 FACS sorted cell-type-specific nuclei as  
659 previously described (49). In brief, total RNA was extracted from nuclei and the Smartseq2 protocol  
660 (50) was implemented to generate libraries. Sequencing was performed on an Illumina NovaSeq 6000  
661 within the National Genomics Infrastructure in Scilife lab, Stockholm, Sweden. Raw 51 bp paired-end  
662 reads were aligned to the mouse genome (mm10 assembly) using STAR v2.7.0a with default settings  
663 (51). Gene expression was calculated using RPKM for genes (52). Differential gene expression analysis  
664 was performed using DESeq2 (53) with two separate DESeqDataSets, one for all mDA samples and one  
665 for all 5HT samples . A total of 35 mDA samples (9 wt and 10 mutant at 4 months, 8 wt and 8 mutant  
666 at 8 months) and a total of 16 5HT samples (4 wt and 4 mutant at both 4 months and 8 months) were  
667 used. Each dataset was filtered for genes with a least a total count of 10 summed across all samples.  
668 Differentially expressed genes were identified by requiring adj p<0.05 and using design formulas

669 controlling for sex and contrasting wild type with mutant samples separately for 4 months and 8  
670 months. GO-terms were obtained from Enrichr (24, 25).

### 671 **ChIP-sequencing and analysis**

672 ChIP and library preparation for sequencing were performed as previously described in the ULI-NChIP  
673 protocol (54) with previously described minor modifications (49). Chromatin was IPed for 16-18h at  
674 4°C with 0.25µg of anti-H3K27me3 (Cell Signaling,9733), anti-H3K9me3 (Active Motif,39161) or anti-  
675 H3K4me3 (Cell Signaling,9751). Libraries were sequenced on an Illumina NovaSeq 6000, 51 bp paired-  
676 end read.

677 A total of 64 ChIP-seq libraries were sequenced (two genotypes: wt and mutants, two time-points: 4  
678 months and 8 months, four IPs: input, H3K4me3, H3K27me3 and H3K9me3, and finally four biological  
679 replicates for each combination). Reads were mapped to the mm10 mouse genome using bowtie2  
680 v2.3.5.1 with default settings (55). Duplicate reads were marked using Picard v2.10.3. Coverage of  
681 mapped ChIP-seq libraries was generated using the tool bamCoverage in deepTools v3.1 with  
682 parameters ignoreDuplicates, binSize 50 and normalizeUsing RPKM (56). Signal-to-background  
683 relationships were investigated using the plotFingerprint tool in deepTools. Based on manual  
684 inspection of fingerprint and coverage plots, we decided to use all 64 samples in further analyses. The  
685 median fraction of duplicated reads for all samples was 34% (range 17–52). The median fraction of  
686 unmapped reads was 18% (range 7–60). The median total number of million mapped unique reads  
687 (after removal of duplicates) were 70 for inputs (range 38–78), 31 for H3K4me3 (range 17–40), 24 for  
688 H3K27me3 (range 8–63), and 60 for H3K9me3 (range 41–86).

689 For each histone modification and genotype, we identified marked genes by comparing the ChIP  
690 experiments to the input experiments using the csaw package version 1.22.1 in R (57) as previously  
691 described(49) with the following changes. Reads mapping to regions in the curated blacklist of  
692 problematic regions available as the bed-file ENCF547MET from the ENCODE project were removed.  
693 Windows displaying an enrichment of reads above the global background were kept by requiring a

694 minimal log<sub>2</sub> fold-change (lfc) of two for all experiments except lfc=3 for K4 at 4 months and lfc=1.5  
695 for K9 at 8 months. In each comparison, 4 biological replicates were used both for the ChIP and the  
696 input experiments. Marked genes were mapped to gene expression data based on gene symbols.

697 For visualizations, biological replicates were pooled. ChIP-seq coverage files of pooled samples were  
698 generated in deepTools using the bamCoverage function as for individual replicates. From the pooled  
699 coverage files, ChIP-seq heatmaps and average profile heatmaps were generated with deepTools  
700 using the plotHeatmap function and the plotProfile function, respectively. Coverages were plotted  
701 using the Integrative Genomics Viewer (IGV) version 2.8.3.

702 Enrichment for a specific chromatin state in a gene set was investigated by comparing the number of  
703 genes with the chromatin state in the gene set to the number of such chromatin states in a background  
704 set based on all genes using 2 × 2 contingency tables and Fisher's exact test.

705

#### 706 **Analysis of neurotransmitters by high-performance liquid chromatography (HPLC)**

707 HPLC with electrochemical detection (ECD) were based on previously published protocols (58, 59).  
708 Briefly, ice-cold 0.1 M perchloric acid (PCA) was added to tissue sample, 50 µL PCA per 10 mg of tissue.  
709 Samples were incubated on ice for 10 minutes, vortexed and centrifuged at 16000 x g for 10 minutes  
710 at 4°C. Resulting supernatants were filtered through 0.2 µm nylon membrane inserts and centrifuged  
711 at 4000 x g for 5 minutes. Eluents were immediately stored at -80°C and subjected to HPLC-ECD  
712 analysis within 1 week. Standard solutions of: L-norepinephrine hydrochloride (NE), (+/-)-Epinephrine  
713 hydrochloride (EPI), 3,4-dihydroxyphenylacetic acid (DOPAC), 3,4-Dihydroxy-L-phenylalanine (DOPA),  
714 dopamine hydrochloride (DA), 5-hydroxyindole-3-acetic acid (5-HIAA), homovanillic acid (HVA),  
715 serotonin hydrochloride (5-HT), 4-Hydroxy-3-methoxyphenylglycol hemipiperazinium salt (MHPG),  
716 DL-4-Hydroxy-3-methoxymandelic acid (VMA) and 3-Methoxytyramine hydrochloride (3-MT) were  
717 prepared in 0.1 M PCA to obtain final standard concentrations of 200, 100, 50, 10, 5, 2 and 1 ng/mL.  
718 Calibration curves were obtained with the Chromeleon software through linear regression of peak

719 area versus concentration. The HPLC-ECD system used was a Dionex Ultimate 3000 series (Dionex,  
720 ThermoFisher Scientific, USA). Analyte separation was performed on a Dionex C18 reversed-phase  
721 MD-150 3.2 mm x 250 mm column (3  $\mu$ m particle size). Column and analytical cell were kept at 30 °C.  
722 The mobile phase, which was pumped at a flow rate of 0.4 ml/min, consisted of 75 mM monobasic  
723 sodium phosphate, 2.2 mM 1-octanesulfonic acid (OSA) sodium salt, 100  $\mu$ L/L triethylamine (TEA), 25  
724  $\mu$ M ethylene-diamine-tetra-acetic acid (EDTA) disodium salt and 10 % acetonitrile (v/v), pH 3.0  
725 adjusted with 85% phosphoric acid. For detection of neurotransmitters and metabolites, the first and  
726 second analytical cells were set to -100 mV and +300 mV, respectively. Processed tissue samples were  
727 thawed on ice in the dark for about 1 h before analysis, placed in the autosampler and kept at 5°C  
728 before injection. Chromatograms were acquired with Dionex Chromeleon 7 software over an  
729 acquisition time of 55 minutes. Analytes concentrations in tissue samples were expressed as ng/mg of  
730 tissue.

### 731 **Electrophysiology of mDA neurons**

732 Mice were perfused with aCSF containing (in mM): NaCl (126), KCl (2.5), NaH<sub>2</sub>PO<sub>4</sub> (1.2), MgCl<sub>2</sub> (1.3),  
733 CaCl<sub>2</sub> (2.4), glucose (10) and NaHCO<sub>3</sub> (26). Their brains were rapidly removed and coronal brain slices  
734 containing SN 200  $\mu$ m thick, were prepared with a microslicer (VT 1000S, Leica Microsystem,  
735 Heppenheim, Germany) in oxygenated (95% O<sub>2</sub> + 5% CO<sub>2</sub>) ice cold modified artificial cerebrospinal  
736 fluid (aCSF) containing (in mM): NaCl (15.9), KCl (2), NaH<sub>2</sub>PO<sub>4</sub> (1), Sucrose (219.7), MgCl<sub>2</sub> (5.2), CaCl<sub>2</sub>  
737 (1.1), glucose (10) and NaHCO<sub>3</sub> (26). Slices were incubated, for 1 h at 32 °C and thereafter at 28 °C, in  
738 oxygenated modified aCSF containing (in mM): NaCl (126), KCl (2.5), NaH<sub>2</sub>PO<sub>4</sub> (1.2), MgCl<sub>2</sub> (4.7), CaCl<sub>2</sub>  
739 (1), glucose (9) and NaHCO<sub>3</sub> (23.4). Slices were transferred to a recording chamber and were  
740 continuously perfused with oxygenated aCSF at 32-34 °C.

741 Whole-cell patch-clamp recordings of visually identified DA neurons in the SN were made as described  
742 previously (Yao et al., 2018). Borosilicate patch electrodes (3-5 M $\Omega$ ) were filled with a solution  
743 containing, in mM: 120 D-gluconic acid potassium salt, 20 KCl, 2 MgCl<sub>2</sub>, 1 CaCl<sub>2</sub>, 10 HEPES, 10 EGTA, 2

744 MgATP, 0.3 Na<sub>3</sub>GTP, pH adjusted to 7.3 with KOH. Whole-cell membrane currents and potentials were  
745 recorded with a MultiClamp 700B (Axon Instruments, Foster City CA, USA), acquired at 10 kHz and  
746 filtered at 2 kHz. Data were acquired and analyzed with the pClamp 11 software (Axon Instruments,  
747 Foster City CA, USA).

#### 748 **Viral tracing injections**

749 Mice were anesthetized with 4mg/ml isoflurane supplemented in the air, while placed in a separate  
750 cage and afterwards they were mounted in a stereotaxic frame (David Kopf Instruments, Tujunga, CA)  
751 equipped with a mouse adapter. Mice were kept anesthetized throughout the procedure by inhaling  
752 isoflurane at 2mg/ml concentration. Anterograde tracing of the midbrain dopaminergic neurons was  
753 achieved by injecting a Cre-dependent adeno-associated virus (AAV) expressing EGFP  
754 (AAV2/2.pCAG.FLEX.EGFP.WPRE.bGH)(26) in the midbrain of 8 months old mice. Using Bregma as a  
755 reference point, 1μl of the AAV virus was injected unilaterally reaching the SN (anteroposterior (AP):  
756 -2.9, mediolateral (ML): -1.25, dorsoventral (DV): -4.5) and 1μl reaching the VTA (anteroposterior (AP):  
757 -3.1, mediolateral (ML): -0.5, dorsoventral (DV): -4.2). All coordinates are millimeters relative to  
758 Bregma according to *The Mouse Brain in Stereotaxic Coordinates* (Academic Press, San Diego, CA,  
759 2012). Virus injection was executed at 0.2μl/min dispense rate. Animals were sacrificed 3 weeks after  
760 surgery by CO<sub>2</sub>.

761

#### 762 **Behavioral Experiments**

##### 763 **Open field**

764 For assessment of general ambulatory ability, mice were placed in 45 x 45 x 28 cm plastic, non-  
765 transparent boxes and activity was recorded for 60 min using the Ethovision XT 15, Noldus software.  
766 Activity is measured as mean of total distance covered in 1 hr with 5 min time bins.

##### 767 **Pole test**

768 Motor coordination and movement initiation were assessed by the pole test. To perform this task,  
769 mice were placed on the top of a wooden pole (50cm height, 1cm diameter) that is fixed to a wooden  
770 stable base. Each animal was placed with all four limbs grasping the pole and facing the tip of it. The  
771 total time they spent to turn themselves downwards and climb down the pole was calculated.

772 The day before the experiment, mice were trained to orient themselves and descent the pole for 5-10  
773 times. On the test day, each animal was recorded performing the test for 5 times and the average time  
774 for every mouse is presented. In order to avoid exhaustion of the mice, a maximum time for every trial  
775 was defined at 120s, time score that was also given to objects that failed the experiment, by either  
776 not turning themselves downwards at all or by descended the pole by rolling down.

#### 777 **Elevated Plus Maze**

778 The Elevated Plus Maze (EPM) test evaluates anxiety-like behavior in mice. The set up consisted of a  
779 cross with two open arms and two enclosed ones, elevated ~1 meter from the ground. Mice were  
780 placed in the centre of the cross, facing towards the open compartment. Mobility and preference over  
781 the two types of arms were recorded for 5 min using Ethovision XT, Noldus software.

#### 782 **Rearing**

783 Locomotion activity and exploratory behavior were evaluated by the rearing events. Mice were placed  
784 in a plexiglass 15 cm-diameter cylinder and videotaped for 10 minutes. Vertical rearing events  
785 supported on the cylinder wall or unsupported were manually counted. Mice were tested individually,  
786 without any visual interaction with each other.

#### 787 **Forced Swim Test**

788 The Forced Swim Test (FST) or Porsolt test (60) was used to evaluate depression-like traits in rodents.  
789 More specifically mice were forced to swim in a plexiglass cylinder (15cm-diameter 30cm height)  
790 halfway filled with water at 25±C for 6 min. During the session mice were recorded and time of  
791 immobility was assessed by a trained observer. The first two minutes were counted as habituation  
792 time and the left four minutes served as the actual experiment. During those minutes, as immobility

793 time was counted the time mice spent floating in the water without any effort to move but only the  
794 necessary moves that would let them keep the head above the surface. Video recordings were scored  
795 twice from the same observer and the average of those scores were calculated.

#### 796 **Rotarod**

797 Motor coordination was evaluated by utilising the rotarod test with increasing speed. Mice were  
798 familiarized with the apparatus for three trials at a fixed speed of 4rpm. After a resting period of 2  
799 hours, mice performed the test with increasing speed over time. The acceleration protocol spans from  
800 4 rpm to 38 rpm within 5 min, where the latency to fall was measured. Every mouse participated 3  
801 times and the average time was calculated for every individual.

#### 802 **Grip Strength**

803 Mice were placed horizontally on a metal net-shaped frame with all four limbs and instantly the  
804 apparatus was twisted 180°. With that set up, the back of the mice was facing the ground and the  
805 time they managed to hold gripped on the frame was calculated. Each individual was monitored for 3  
806 trials and the average time was noted.

#### 807 **Conditioned Place Preference**

808 Experiment was performed in a rectangular apparatus with 3 chambers measuring 15x25 cm each.  
809 One compartment was coloured grey, the middle one was white and the last one was coloured with  
810 black and white stripes. One the first day mice were allowed to explore the whole apparatus for 20  
811 min. On day 2 and 3 mice were confined to one compartment and injected with cocaine (20mg/kg) or  
812 saline. After injection they remained in the compartment for 30 min. On day 4 and 5 the same pairings  
813 were repeated. Pairing of drug and compartment was counterbalanced across animals. On day 6 mice  
814 were placed in the middle compartment and were freely allowed to move between all 3 of them.  
815 While there was no injection on that day, mice were recorded and their preference for every  
816 compartment was calculated.



817 The following day all mice were injected with cocaine (20mg/kg) and their motor skills and mobility  
818 were examined in the Open Field test, where they were recorded for 60 minutes.

819

### 820 **Single nucleus RNA sequencing and analysis.**

821 Tissue from mouse ventral midbrain (3 control and 3 KO) were used to obtain the single nuclei (1883  
822 control & 4103 KO). Single nucleus libraries were made using Single Cell 3' v3 on Chromium platform  
823 (10X Genomics & SciLifeLab, Stockholm) in accordance with the manufacturer's protocols. Libraries  
824 were sequenced on a NovaSeq 6000 system (NGI, SciLifeLab, Stockholm).

825 Sequenced reads were demultiplexed and aligned to Transcriptome: mm10-3.0.0\_premrna using Cell  
826 Ranger Pipeline Version 3.1.0 (10X Genomics). Quality control and filtering of data were performed  
827 in multiple steps. First, percent\_mito% and percent\_ribo% were computed based on the percentage  
828 of transcripts that map to mitochondrial genes and ribosomal genes respectively. Then,  
829 CellCycleScoring (Score cell cycle phases); S.Score, G2M.Score, and Phase columns were calculated  
830 based on the expression of G2/M and S phase canonical markers. Next, average relative expression of  
831 each gene per cell i.e., the ratio of a gene's UMI counts to the sum of all UMIs per library (nucleus),  
832 was calculated. *Malat1* was on average the most abundant gene per library (nucleus), with a mean  
833 fraction of total UMI counts per library of about 2% and being expressed in all nuclei. *Malat1* is  
834 frequently detected in poly-A captured RNA-seq libraries, independent of the used protocol. However,  
835 compared to other methods it is even more abundant in snRNA-seq and therefore used to estimate  
836 the nuclear proportion of total mRNA (<https://doi.org/10.1371/journal.pone.0209648>). *Malat1* was  
837 filtered out for downstream analysis. Genes detected in fewer than 3 libraries were removed. Libraries  
838 with less than 500 detected genes, more than 10,000 detected genes (doublets) and with a percent  
839 mito > 0.9 were also filtered out. After the filtering steps, 1772 control and 3968 KO nuclei remained.  
840 The remaining nuclei have UMI/library over 620, gene/library over 500, with average UMI/library  
841 23474 and average gene/library 4965.

842 Then a Seurat object was made with this filtered data (Seurat version '4.0.1'). Data was log-normalized  
843 with Seurat NormalizeData function, and a scale.factor of  $10e^4$ . Next, the 2000 of most highly variable  
844 genes (HVGs) were identified using the FindVariableFeatures function (selection.method = "vst", with  
845 clip.max =  $(n.Cells)^2$ ). The log-normalized data were then scaled and centered using the ScaleData  
846 function (model.use = "linear"). Principal Component Analysis (PCA) was done using the 2000 HVGs,  
847 which reduced the dimensionality of the data into the calculated components whilst maintaining the  
848 most important gene expression differences across libraries.

849 We identified the most significant PCs based on the JackStraw procedure using the JackStraw  
850 (num.replicate = 100) and ScoreJackStraw functions. After plotting the JackStraw scores, noticeable  
851 gaps in p-values were observed at PCs 18, 22 and 32. We also used a heuristic method called ElbowPlot  
852 to visualize the standard deviations of the principal components and at PCs 18, 22, and 32 there were  
853 noticeable inflection points ("elbows"). We chose to continue with the first 32 PCs, which we think  
854 contain most of the variance without losing any true signal that reflects biological heterogeneity. Next  
855 we used PCs 1-32 as input to the Seurat FindNeighbors function (k.param = 20, dims = 1:32), as well  
856 as in the FindClusters function with the resolution parameter between 0.3 and 2.0 in 0.1 intervals,  
857 using the Louvain algorithm. We found the most optimal resolution for res = 0.3 with 18 clusters (a  
858 purely heuristic approach based on known markers for cell types, neuroanatomical regions and  
859 hierarchical dendrograms). The final 9 subgroups were created by combining related clusters together  
860 and based on markers in UMAP and hierarchical dendrograms. The same PCs 1-32 were used in the  
861 Seurat function RunUMAP. Subgroup-enriched markers (upregulated & downregulated) were  
862 identified using Wilcoxon Rank Sum test (logfc.threshold = 0.25, min.pct = 0.1, min.diff.pct = -Inf,  
863 only.pos = FALSE). In this function, p-values were adjusted for multiple comparisons with the  
864 Bonferroni correction.

865 DEG was also performed between all control nuclei and all KO nuclei, irrespective of clusters/  
866 subgroups, using the FindMarkers function with the same setting and parameters as above.

867 Hierarchical clustering was done for all mDA subgroups (SNpc, VTA1-3, SNpc/VTA), by genotype (WT,  
868 KO), using the 2000 most highly variable genes and the Seurat BuildClusterTree function. This  
869 clustering results in a phylogenetic tree based on calculating the 'average' cell from each mDA  
870 subgroup\_genotype "identity class". The distance matrix for this tree was calculated in gene  
871 expression space.

872 Heatmaps showing the clustering analyses, using either DEGs between control and KO (all nuclei  
873 irrespective of cluster) or the 2000 HVGs across the subgroups split by genotype (subgroup\_WT,  
874 subgroup\_KO) were generated using ComplexHeatmap version2.6.2(61).

#### 875 **mDA-neuron signature (*Th*, *Slc6a3*, *En1*, *Nr4a2*)**

876 A composite expression score of a mDA neuron gene set (*Th*, *Slc6a3*, *En1*, *Nr4a2*) was used. The Seurat  
877 AddModuleScore function was used to calculate the average expression levels of this gene set  
878 (signature) on single nuclei level. Genes in this gene set are binned based on their averaged expression,  
879 and the control features are randomly selected from each bin.

880 The same function was applied to calculate the signature score for the top 25 most highly upregulated  
881 genes in the KO nuclei when compared to the WT nuclei, irrespective of their clusters.

882

883

884

885

886

887

888

889

890

891

892 **Figures**

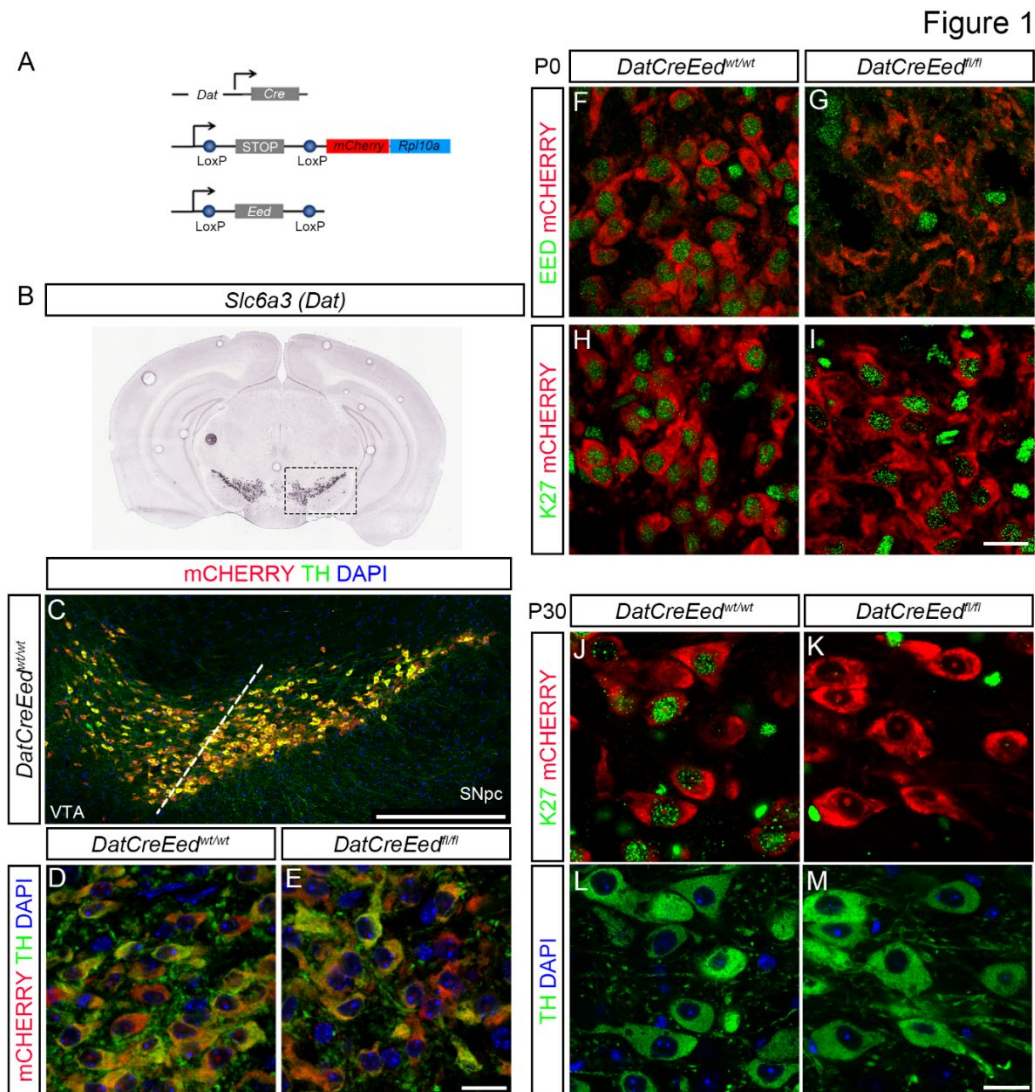

893

894 **Figure 1. Deletion of *Eed* leads to progressive loss of H3K27me3 in differentiated mDA neurons (A).**

895 Schematic representation of the three constructs used to generate the mutant mice. (B). *In situ*

896 hybridization for *Slc6a3 (Dat)* taken from the Allen Brain Atlas (mouse.brain-map.org, image credit:

897 Allen Institute). (C). Immunostaining of ventral midbrain in *DatCreEed<sup>wt/wt</sup>* as indicated by box in B,

898 showing overlap between mCHERRY and TH. (D-E). Immunostaining at 63x magnification showing

899 overlap of TH and mCHERRY in SNpc of *DatCreEed<sup>wt/wt</sup>*-mice (D) and *DatCreEed<sup>fl/fl</sup>*-mice (E). (F). mDA

900 neurons double positive for EED and mCHERRY immunostaining at P0 in *DatCreEed<sup>wt/wt</sup>* SNpc. (G). Loss

901 of EED in mCHERRY<sup>+</sup>-cells at P0 in *DatCreEed<sup>fl/fl</sup>* SNpc. (H). mDA neurons double positive for H3K27me3

902 and mCHERRY immunostaining at P0 in *DatCreEed<sup>wt/wt</sup>* SNpc. (i). mDA neurons double positive for

903 H3K27me3 and mCHERRY immunostaining at P0 in *DatCreEed<sup>fl/fl</sup>* SNpc. **(J)**. mDA neurons double  
904 positive for H3K27me3 and mCHERRY immunostaining at P30 in *DatCreEed<sup>wt/wt</sup>* SNpc. **(K)**. Loss of  
905 H3K27me3 in mCHERRY<sup>+</sup>-cells at P30 in *DatCreEed<sup>fl/fl</sup>* SNpc. **(L)**. Staining with TH and DAPI of the  
906 *DatCreEed<sup>wt/wt</sup>*-cells from panel **J**. **(M)**. Staining with TH and DAPI of the *DatCreEed<sup>fl/fl</sup>*-cells from panel  
907 **K**. Scale bars in E, L:20µm

908

909

910

911

912

913

914

915

916

917

918

Figure 2

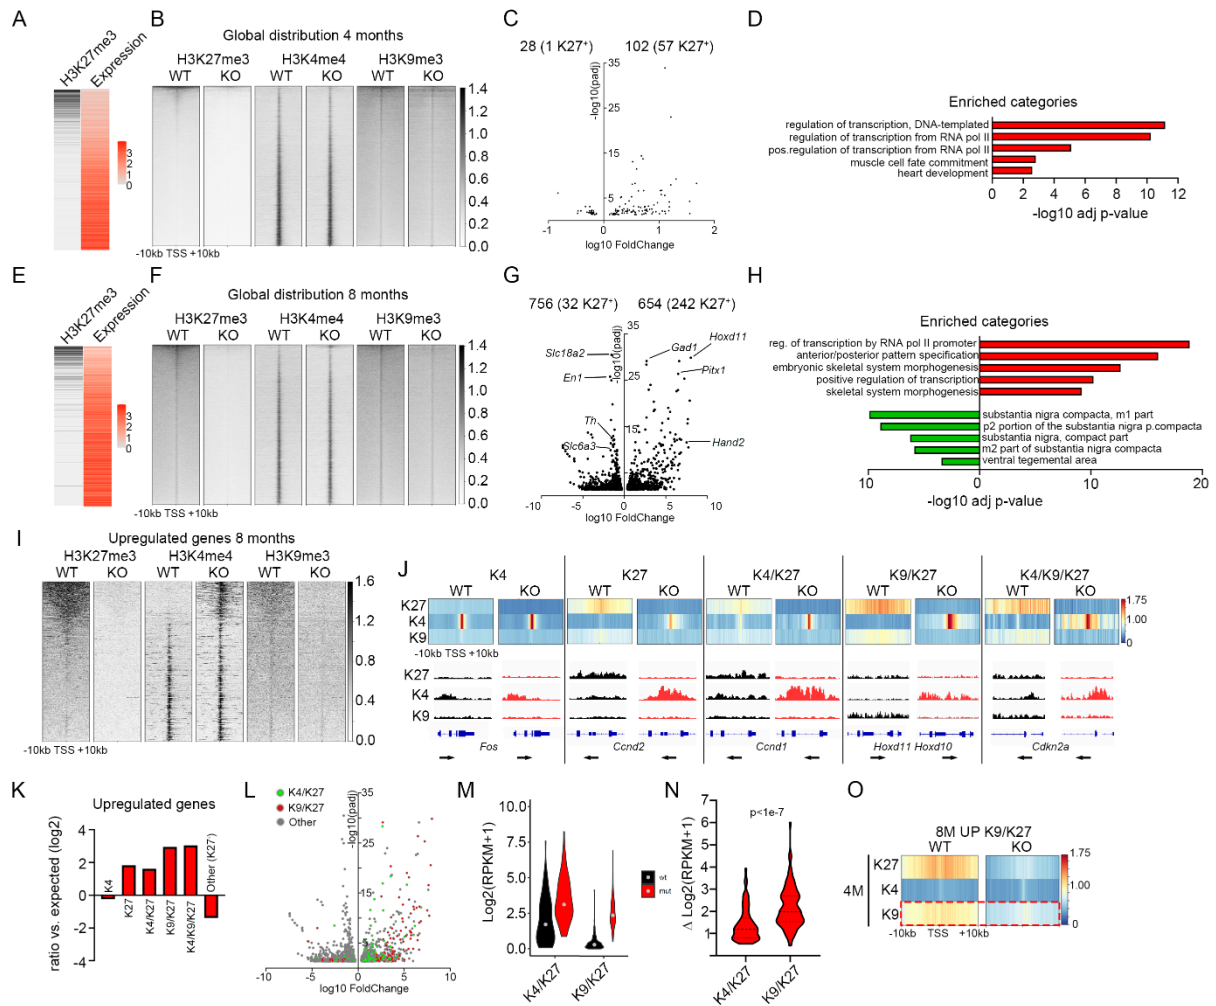

919

920 **Figure 2. Loss of *Eed* results in progressive upregulation of PRC2 targets and reduced expression of**  
 921 **mDA-neuronal genes. (A).** Heatmaps showing inverse correlation between H3K27me3 (black) and  
 922 expression levels (red). **(B).** Heat maps showing genome wide abundance of H3K27me3, H3K4me3 and  
 923 H3K9me3 at 4 months in *DatCreEed*<sup>wt/wt</sup> (WT) and *DatCreEed*<sup>fl/fl</sup> (KO) at 10kb upstream and  
 924 downstream of TSS at individual genes ranked by H3K27me3 abundance in the WT. **(C).** Volcano plot  
 925 showing differentially regulated genes at 4 months in isolated mCHERRY<sup>+</sup>-nuclei from *DatCreEed*<sup>fl/fl</sup>  
 926 ventral midbrain. Number of upregulated and downregulated genes are indicated above the plot, with  
 927 the number of H3K27me3<sup>+</sup>-genes within brackets. **(D).** Enriched categories for upregulated genes (red)  
 928 (GO biological process) are characterized by activation of transcription and early developmental non-  
 929 neuronal processes. **(E).** Heatmaps showing inverse correlation between H3K27me3 (black) and



930 expression levels (red). **(F)**. Heat maps showing genome wide abundance of H3K27me3, H3K4me3 and  
931 H3K9me3 at 8 months in *DatCreEed<sup>wt/wt</sup>* (WT) and *DatCreEed<sup>fl/fl</sup>* (KO) at 10kb upstream and  
932 downstream of TSS at individual genes ranked by H3K27me3 abundance in the WT. **(G)**. Volcano plot  
933 showing differentially regulated genes in isolated mCHERRY<sup>+</sup>-nuclei from *DatCreEed<sup>fl/fl</sup>* ventral  
934 midbrain. Number of upregulated and downregulated genes are indicated above the plot, with the  
935 number of H3K27me3<sup>+</sup>-genes within brackets. Examples of upregulated genes that are PRC2 targets  
936 in *DatCreEed<sup>wt/wt</sup>* mDA neurons are labelled on the right side of the plot. Examples of downregulated  
937 mDA-identity genes are labelled on the left side of the plot. **(H)**. Enriched categories for upregulated  
938 genes (red) (GO biological process) are characterized by activation of transcription and early  
939 developmental non-neuronal processes, whereas downregulated genes (green) show enrichment for  
940 ventral midbrain categories (Up in Allen Brain Atlas, as calculated by Enrichr). **(I)**. Heat maps showing  
941 abundance of H3K27me3, H3K4me3 and H3K9me3 at genes upregulated in 8 months *DatCreEed<sup>fl/fl</sup>*  
942 (KO) at 10kb upstream and downstream of TSS at individual genes ranked by H3K27me3 abundance  
943 in the WT. **(J)**. Heatmap profiles of average H3K27me3, H3K4me3 and H3K9me3 RPKMs  $\pm$ 10kb around  
944 TSS of genes per defined chromatin states (denoted as K4, K27, K4/K27, K9/K27 and K4/K9/K27) in 8-  
945 month *DatCreEed<sup>wt/wt</sup>* (WT) and how these states are resolved in the *DatCreEed<sup>fl/fl</sup>* (KO) mDA-nuclei.  
946 Below each chromatin state, IGV-tracks exemplify how the chromatin states compare at  
947 representative genes between WT and KO. **(K)**. Enrichment/depletion of chromatin states for  
948 upregulated genes in *DatCreEed<sup>fl/fl</sup>* mCHERRY<sup>+</sup>-cells at 8months. **(L)**. Volcano plot as in **B** showing  
949 differentially regulated genes belonging to H3K4me3/H3K27me3 (green) or H3K9me3/H3K27me3  
950 (red) chromatin states in WT cells. **(M)**. Violin plot showing absolute expression level ( $\log_2(\text{RPKM}+1)$ )  
951 of upregulated genes in KO mDA-cells belonging to K4/K27 or K9/K27 chromatin states in 8-month WT  
952 mDA-cells. **(N)**. Difference ( $\Delta$ ) in gene expression between WT and KO of genes belonging to K4/K27  
953 or K9/K27. Student's t-test. **(O)**. Genes belonging to the K9/K27 chromatin state and upregulated in  
954 KO mDA-cells at 8-months have reduced K9 surrounding TSS already at 4 months despite no increased  
955 expression at 4 months.

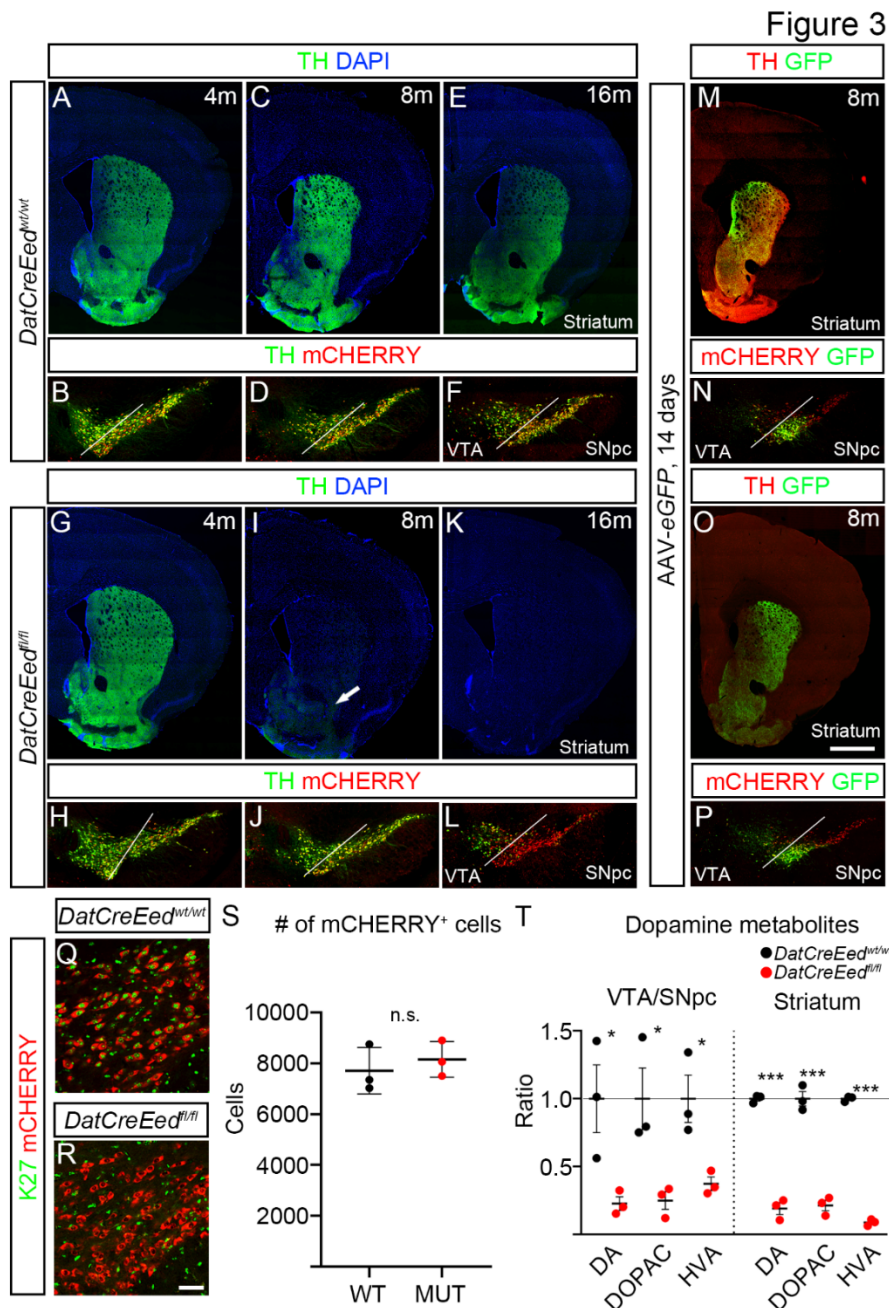

956

957

**Figure 3. Reduced levels of TH and dopamine metabolites in striatum and midbrain upon**

958 **inactivation of PRC2 (A).** TH immunostaining in the striatum of *DatCreEed*<sup>wt/wt</sup>-mice at 4 months. (B).

959 TH immunostaining and mCHERRY-fluorescence in the ventral midbrain of *DatCreEed*<sup>wt/wt</sup>-mice at 4

960 months. (C). TH immunostaining in the striatum of *DatCreEed*<sup>wt/wt</sup>-mice at 8 months. (D). TH

961 immunostaining and mCHERRY-fluorescence in the ventral midbrain of *DatCreEed*<sup>wt/wt</sup>-mice at 8

962 months. (E). TH immunostaining in the striatum of *DatCreEed*<sup>wt/wt</sup>-mice at 16 months. (F). TH

963 immunostaining and mCHERRY-fluorescence in the ventral midbrain of *DatCreEed*<sup>wt/wt</sup>-mice at 16



964 months. **(G)**. TH immunostaining in the striatum of *DatCreEed<sup>fl/fl</sup>*-mice at 4 months. **(H)**. TH  
965 immunostaining and mCHERRY-fluorescence in the ventral midbrain of *DatCreEed<sup>fl/fl</sup>*-mice at 4  
966 months. **(I)**. Reduced TH immunostaining in the striatum of *DatCreEed<sup>fl/fl</sup>*-mice at 8 months. Arrow  
967 indicates reduced albeit detectable TH immunostaining in the Nucleus Accumbens. **(J)**. TH  
968 immunostaining and mCHERRY-fluorescence in the ventral midbrain of *DatCreEed<sup>fl/fl</sup>*-mice at 8  
969 months. **(K)**. Reduced TH immunostaining in the striatum of *DatCreEed<sup>fl/fl</sup>*-mice at 16 months. **(L)**. TH  
970 immunostaining and mCHERRY-fluorescence in the ventral midbrain of *DatCreEed<sup>fl/fl</sup>*-mice at 16  
971 months. **(M)**. Expression of eGFP in striatum of *DatCreEed<sup>wt/wt</sup>*-mice 21days after injection of AAV-  
972 *eGFP* in ventral midbrain. **(N)**. Site of injection of AAV-*eGFP* in *DatCreEed<sup>wt/wt</sup>*-mice 21 days post-  
973 injection. **(O)**. Expression of eGFP in striatum of *DatCreEed<sup>fl/fl</sup>*-mice 21days after injection of AAV-*eGFP*  
974 in ventral midbrain. **(P)**. Site of injection of AAV-*eGFP* in *DatCreEed<sup>fl/fl</sup>*-mice 21 days post-injection. **(Q)**.  
975 H3K27me3 immunostaining in mCHERRY<sup>+</sup>-cells in SN of 8 months *DatCreEed<sup>wt/wt</sup>*-mice. **(R)**. No  
976 H3K27me3 immunostaining in mCHERRY<sup>+</sup>-cells in SN of 8 months *DatCreEed<sup>wt/wt</sup>*-mice. **(S)**.  
977 Quantification of mCHERRY<sup>+</sup>-cells in ventral midbrain of *DatCreEed<sup>wt/wt</sup>*-mice and *DatCreEed<sup>fl/fl</sup>*-mice at  
978 8 months shows no loss of mCHERRY<sup>+</sup>-cells in the mutant midbrains. **(T)**. Reduced levels of dopamine  
979 metabolites in the ventral midbrain and striatum of *DatCreEed<sup>fl/fl</sup>*-mice. In **T** \*p<0.05, \*\*\* p<0.001,  
980 Unpaired t-test with Welch's correction. Scale bar in O: 1000µm, in R: 50µm.

981  
982

Figure 4

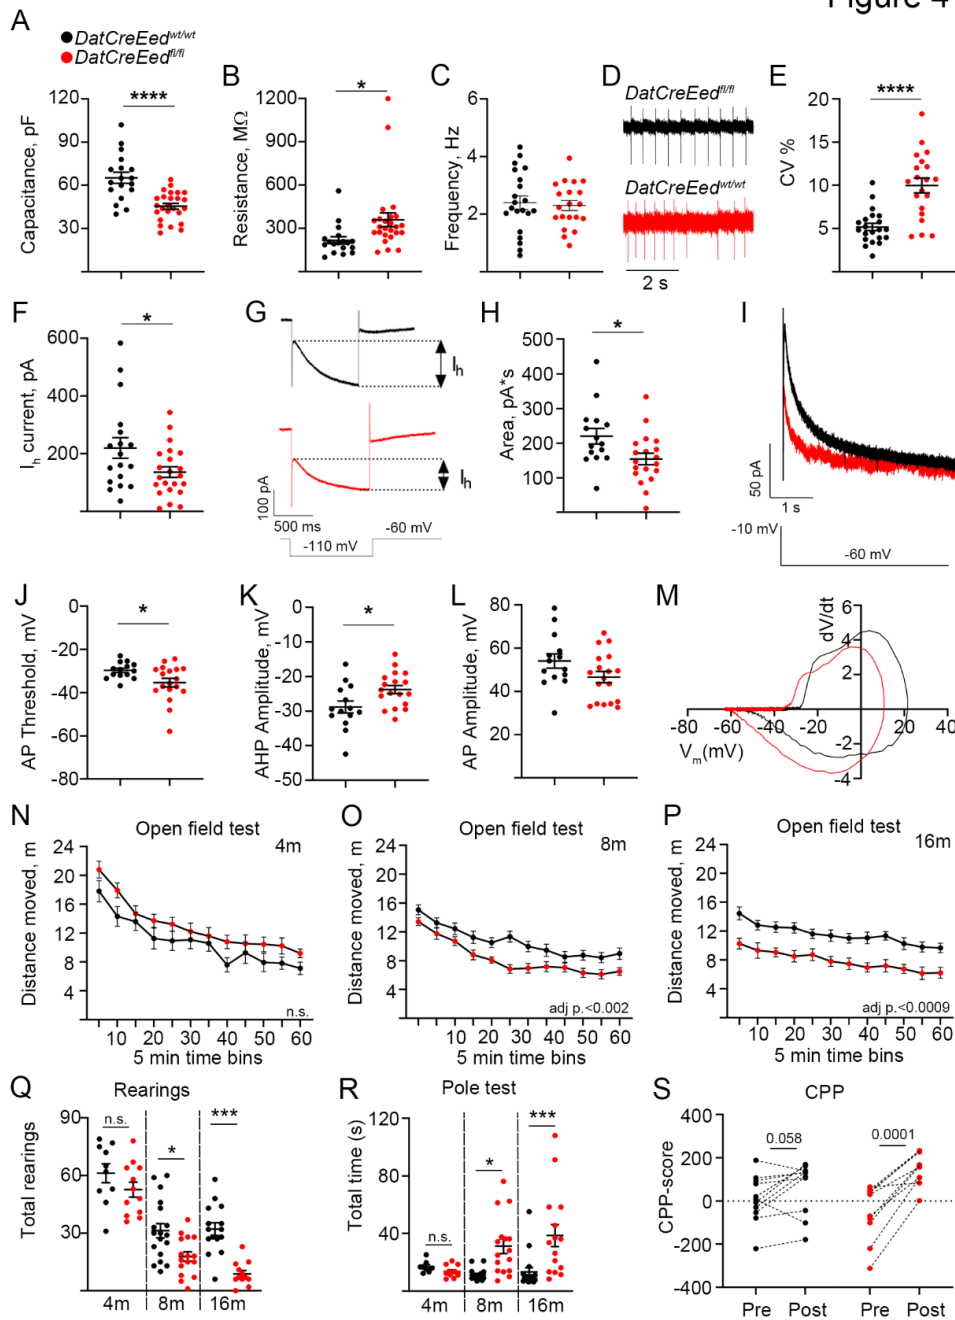

983

984

985 **Figure 4. Altered electrophysiological properties and animal behaviour upon inactivation of PRC2.**

986 (A). Reduced capacitance in 8-month *DatCreEed<sup>f/fi</sup>* mDA neurons. (B). Increased membrane resistance

987 in 8-month *DatCreEed<sup>f/fi</sup>* mDA neurons. (C-E). Increased coefficient of variation of interspike intervals

988 of autonomous pacemaker currents in 8-month *DatCreEed<sup>f/fi</sup>* mDA neurons. (F-G). Decreased

989 hyperpolarization current ( $I_h$ ) in 8-month *DatCreEed<sup>f/fi</sup>* mDA neurons. (H-I). Decreased slow

990 afterhyperpolarization current in 8-month *DatCreEed<sup>f/fi</sup>* mDA neurons. (J-K). Action potential (AP)

991 threshold is reduced (**J**), whereas afterhyperpolarization is decreased (**K**) in *DatCreEed<sup>fl/fl</sup>* mDA  
992 neurons. (**L**). AP amplitude was not significantly reduced in *DatCreEed<sup>fl/fl</sup>* mDA neurons. (**M**). Phase  
993 plot (dV/dt versus  $V_m$ ) of action potential in *DatCreEed<sup>wt/wt</sup>* and *DatCreEed<sup>fl/fl</sup>*-mDA neurons of the  
994 SNpc. (**N-P**). Open field test at 4 months (**N**), 8 months (**O**) and 16 months (**P**) shows progressive  
995 decrease in distance moved by *DatCreEed<sup>fl/fl</sup>*-mice. (**Q**). Progressive increase in total time needed for  
996 *DatCreEed<sup>fl/fl</sup>*-mice to complete the pole test. (**R**). Progressive decrease in number of rearings for  
997 *DatCreEed<sup>fl/fl</sup>*-mice. (**S**). CPP-score pre and post exposure to cocaine in wild type and mutant mice. In  
998 **A-M**, the data sets were checked for normality with Shapiro-Wilk test. For normally distributed data  
999 sets unpaired t-test was used (\* -  $p < 0.05$ , \*\*\*\* -  $p < 0.0005$ ). If the data sets did not pass the normality  
1000 test – Mann-Whitney test was applied. In **N-P**, p-values calculated by Two-way repeated measures  
1001 ANOVA. In **Q-R**, \* $p < 0.05$ , \*\*\* $p < 0.001$  calculated by One-way ANOVA with Tukey's multiple  
1002 comparisons test. In **S** p-values calculated with paired- t-test.

1003  
1004  
1005  
1006  
1007  
1008  
1009

Figure 5

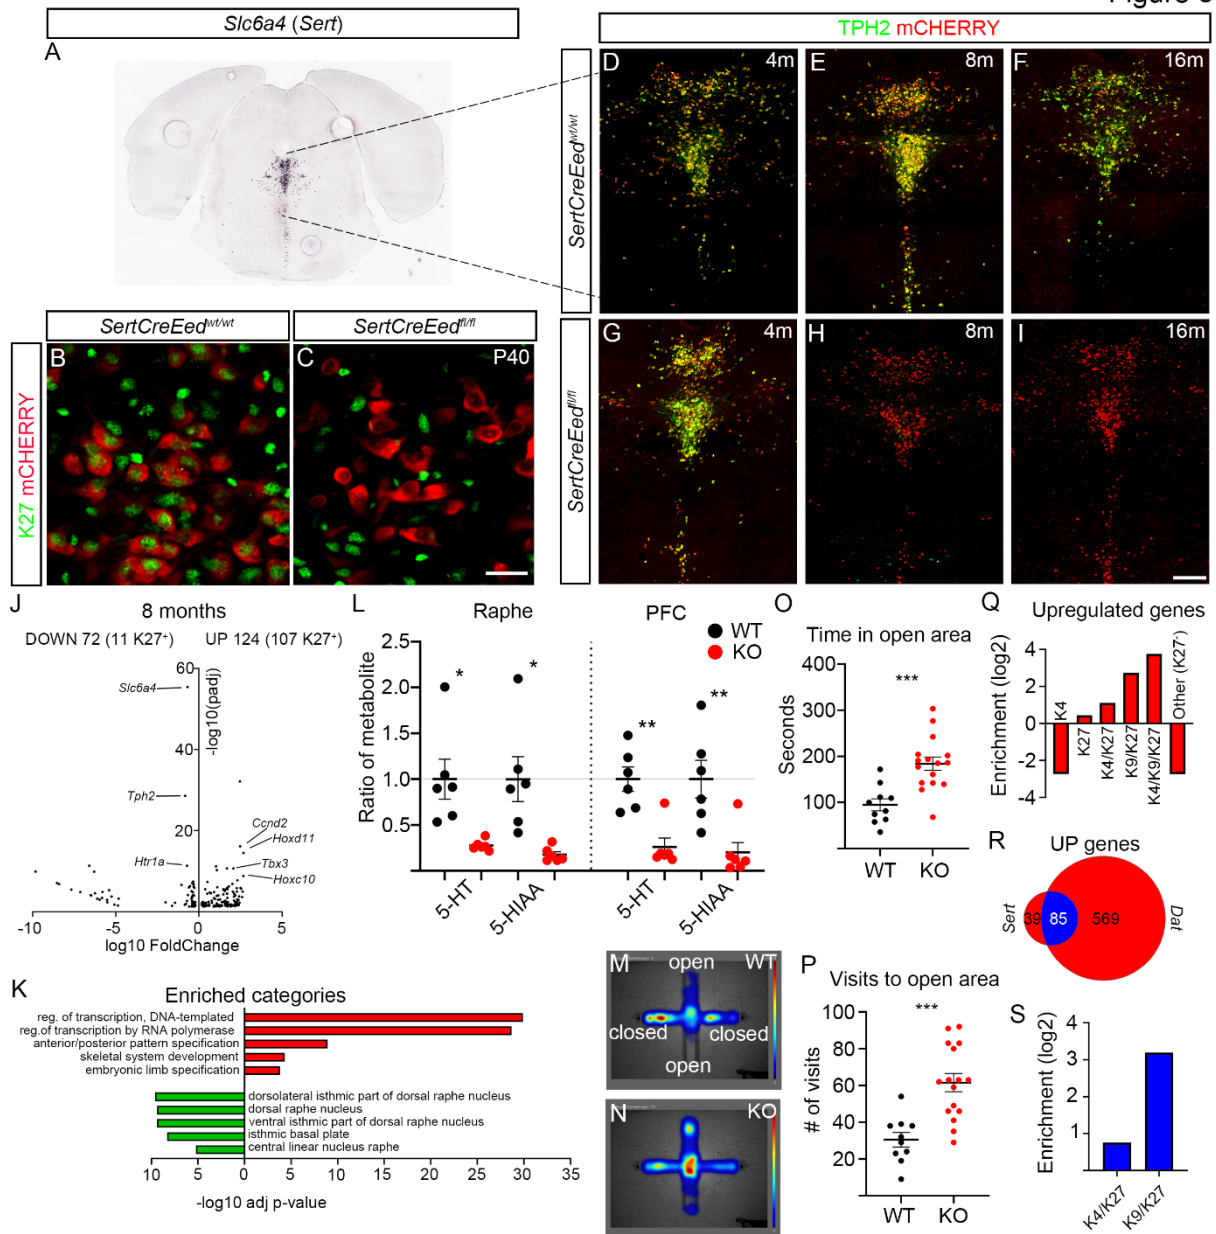

1010  
1011

1012 **Figure 5. *Eed* deficiency in 5HT-neurons results in impaired 5HT-specific gene expression and**  
 1013 **function. (A).** *In situ* hybridization for *Slc6a4* (*Sert*) taken from the Allen Brain Atlas (mouse.brain-  
 1014 map.org, image credit: Allen Institute). (B). Immunostaining of H3K27me3 in mCHERRY<sup>+</sup>-5HT-neurons  
 1015 in the dorsal raphe of *SertCreEed*<sup>wt/wt</sup>-mice. (C). Lack of H3K27me3 immunostaining in mCHERRY<sup>+</sup>-5HT-  
 1016 neurons in the dorsal raphe of *SertCreEed*<sup>fl/fl</sup>-mice. (D-F). TPH2 immunostaining localized in mCHERRY<sup>+</sup>  
 1017 5HT-neurons in the dorsal raphe of *SertCreEed*<sup>wt/wt</sup>-mice aged 4 months (D), 8 months (E) and 16  
 1018 months (F). (G-J). Progressive loss of TPH2 in 5HT-neurons in the dorsal raphe of *SertCreEed*<sup>fl/fl</sup>-mice  
 1019 aged 4 months (G), 8months (H) and 16 months (I). (J). Volcano plot showing differentially regulated

1020 genes in isolated mCHERRY<sup>+</sup>-nuclei from *SertCreEed*<sup>fl/fl</sup> ventral midbrain. Number of upregulated and  
1021 downregulated genes are indicated above the plot, with the number of H3K27me3<sup>+</sup>-genes within  
1022 brackets. Examples of upregulated genes that are PRC2 targets in *SertCreEed*<sup>wt/wt</sup> mDA neurons are  
1023 labelled on the right side of the plot. Examples of downregulated 5HT-identity genes are labelled on  
1024 the left side of the plot. **(K)**. Enriched categories for upregulated genes (red) (GO biological process)  
1025 are characterized by activation of transcription and early developmental non-neuronal processes,  
1026 whereas downregulated genes (green) show enrichment for raphe categories (Up in Allen Brain Atlas,  
1027 as calculated in Enrichr). **(L)**. Reduced levels of serotonin metabolites in the raphe and prefrontal  
1028 cortex (PFC) of *SertCreEed*<sup>fl/fl</sup>-mice. **(M)**. Heatmap of time spent in indicated areas in the elevated plus  
1029 maze (EPM) for *SertCreEed*<sup>wt/wt</sup>-mice. **(N)**. Heatmap of time spent in indicated areas in the elevated  
1030 plus maze (EPM) for *SertCreEed*<sup>fl/fl</sup>-mice. **(O)**. Increased time spent in open area for *SertCreEed*<sup>fl/fl</sup>-mice  
1031 in the EPM. Unpaired t-test with Welch's correction. **(P)**. Increased number of visits to open area for  
1032 *SertCreEed*<sup>fl/fl</sup>-mice in the EPM. Unpaired t-test with Welch's correction. **(Q)**. Enrichment of  
1033 upregulated genes in *SertCreEed*<sup>fl/fl</sup> mCHERRY<sup>+</sup> nuclei at the different chromatin states. **(R)**. Overlap of  
1034 upregulated genes in *DatCreEed*<sup>fl/fl</sup>-mice and *SertCreEed*<sup>fl/fl</sup>-mice, K27<sup>+</sup> genes indicated in blue. **(S)**.  
1035 Commonly upregulated genes in *DatCreEed*<sup>fl/fl</sup>-mice and *SertCreEed*<sup>fl/fl</sup>-mice are more enriched for the  
1036 K9K/K27 chromatin state than the K4/K27 state. In **L**, **O** and **P** \*p<0.05, \*\*p<0.01, \*\*\* p<0.001,  
1037 Unpaired t-test with Welch's correction. Scale bar in C: 20μm, in I: 200μm.

1038

1039

1040

1041

1042

1043

Figure 6

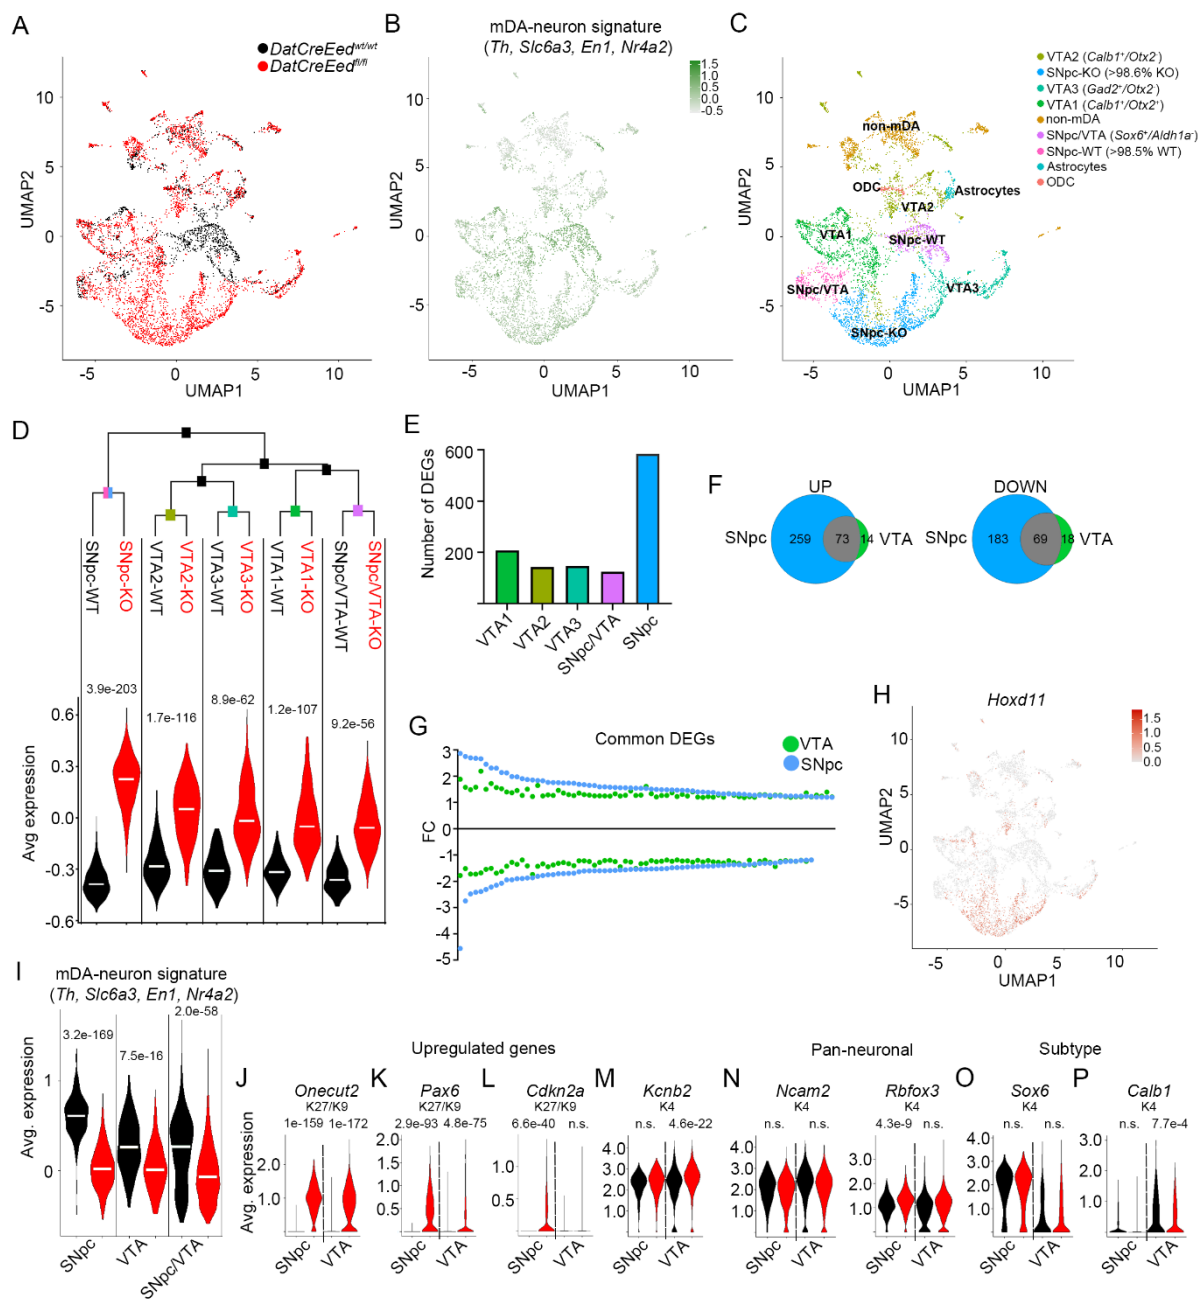

1044

1045 **Figure 6. mDA neurons of the SNpc exhibit selective increased vulnerability to loss of PRC2 activity.**

1046 (A). UMAP showing distribution of wild type (black) and mutant (red) nuclei. (B). Average expression

1047 levels of mDA-identity signature (*Th, Slc6a3, Nr4a2* and *En1*) in sequenced nuclei. (C). Classification of

1048 defined subgroups in sequenced nuclei, in UMAP space. (D). Hierarchical clustering of the mDA-

1049 neuron subgroups defined in (C) based on expression of 2000 most variable genes and composite

1050 expression score of the 25 most upregulated genes in the KO, plotted for the indicated groups. Black

1051 text denotes WT-nuclei and red text denotes KO-nuclei. (E). Number of differentially expressed genes

1052 (DEGs) in *DatCreEed<sup>fl/fl</sup>* mCHERRY<sup>+</sup> single nuclei of the different mDA-neuron groups according to Fig.  
1053 6C. (F). Venn diagram of upregulated (UP) and downregulated (DOWN) genes in *DatCreEed<sup>fl/fl</sup>*  
1054 mCHERRY<sup>+</sup> single nuclei in combined VTA and SNpc. (G). Fold-change of gene expression (FC) for the  
1055 DEGs common between VTA and SNpc for mutant vs. wild type. To put up- and downregulated genes  
1056 on similar scales, the inverted fold-change (-1/FC) is plotted for downregulated genes. (H). UMAP  
1057 visualization of *Hoxd11* expression in sequenced nuclei. (I). Average expression of mDA-neuronal  
1058 signature in wild type (black) and mutant (red) nuclei in groups defined in (C), with VTA representing  
1059 VTA1+VTA2+VTA3. (J-M). Violin plots exemplifying genes upregulated in both mutant SNpc and VTA  
1060 (J), of genes more upregulated in mutant SNpc than in mutant VTA (K), of genes only upregulated in  
1061 mutant SNpc and not in the VTA (L) of genes only upregulated in mutant VTA and not in SNpc (M). (N-  
1062 P). Violin plots of pan-neuronal markers in wild type and mutant SNpc and VTA nuclei (N), of the SNpc-  
1063 marker *Sox6* in wild type and mutant SNpc and VTA nuclei (O), of the VTA-marker *Calb1* in wild type  
1064 and mutant SNpc and VTA nuclei (P). Wilcoxon Rank Sum test, with Bonferroni corrections for adjusted  
1065 p-values. Adjusted p-values are included in panels D and I-P.

1066 **Figures**



Figure 1

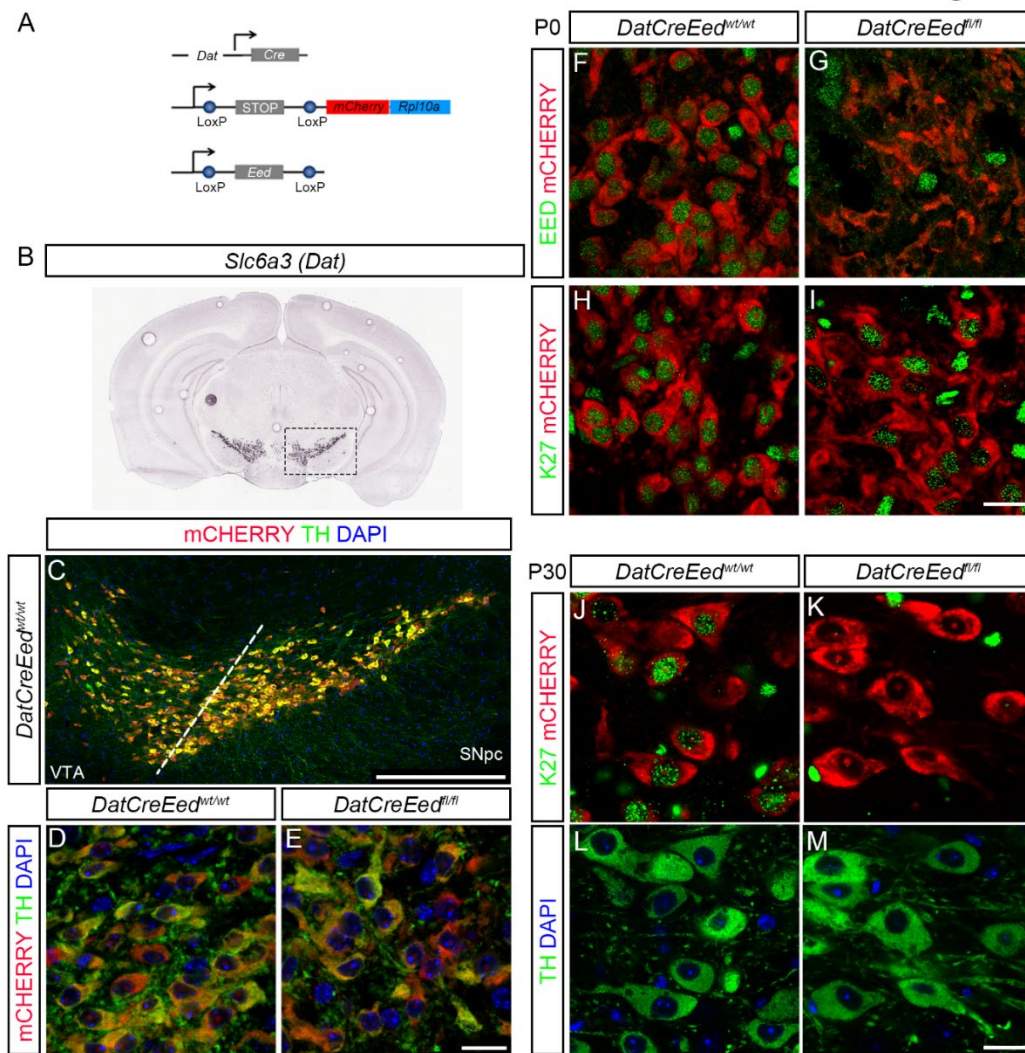

1067

1068 **Figure 1. Deletion of *Eed* leads to progressive loss of H3K27me3 in differentiated mDA neurons (A).**

1069 Schematic representation of the three constructs used to generate the mutant mice. (B). *In situ*

1070 hybridization for *Slc6a3* (*Dat*) taken from the Allen Brain Atlas (mouse.brain-map.org, image credit:

1071 Allen Institute). (C). Immunostaining of ventral midbrain in *DatCreEed*<sup>wt/wt</sup> as indicated by box in B,

1072 showing overlap between mCHERRY and TH. (D-E). Immunostaining at 63x magnification showing

1073 overlap of TH and mCHERRY in SNpc of *DatCreEed*<sup>wt/wt</sup>-mice (D) and *DatCreEed*<sup>f/f</sup>-mice (E). (F). mDA

1074 neurons double positive for EED and mCHERRY immunostaining at P0 in *DatCreEed*<sup>wt/wt</sup> SNpc. (G). Loss

1075 of EED in mCHERRY<sup>+</sup>-cells at P0 in *DatCreEed*<sup>f/f</sup> SNpc. (H). mDA neurons double positive for H3K27me3

1076 and mCHERRY immunostaining at P0 in *DatCreEed*<sup>wt/wt</sup> SNpc. (i). mDA neurons double positive for

1077 H3K27me3 and mCHERRY immunostaining at P0 in *DatCreEed*<sup>f/f</sup> SNpc. (J). mDA neurons double



1078 positive for H3K27me3 and mCHERRY immunostaining at P30 in *DatCreEed*<sup>wt/wt</sup> SNpc. **(K)**. Loss of  
1079 H3K27me3 in mCHERRY<sup>+</sup>-cells at P30 in *DatCreEed*<sup>fl/fl</sup> SNpc. **(L)**. Staining with TH and DAPI of the  
1080 *DatCreEed*<sup>wt/wt</sup>-cells from panel **J**. **(M)**. Staining with TH and DAPI of the *DatCreEed*<sup>fl/fl</sup>-cells from panel  
1081 **K**. Scale bars in E, L:20μm

1082

1083

1084

1085

1086

1087

1088

1089

1090

1091

1092

Figure 2



1093

1094 **Figure 2. Loss of *Eed* results in progressive upregulation of PRC2 targets and reduced expression of**  
 1095 **mDA-neuronal genes. (A).** Heatmaps showing inverse correlation between H3K27me3 (black) and  
 1096 expression levels (red). **(B).** Heat maps showing genome wide abundance of H3K27me3, H3K4me3 and  
 1097 H3K9me3 at 4 months in *DatCreEed*<sup>wt/wt</sup> (WT) and *DatCreEed*<sup>fl/fl</sup> (KO) at 10kb upstream and  
 1098 downstream of TSS at individual genes ranked by H3K27me3 abundance in the WT. **(C).** Volcano plot  
 1099 showing differentially regulated genes at 4 months in isolated mCHERRY<sup>+</sup>-nuclei from *DatCreEed*<sup>fl/fl</sup>  
 1100 ventral midbrain. Number of upregulated and downregulated genes are indicated above the plot, with  
 1101 the number of H3K27me3<sup>+</sup>-genes within brackets. **(D).** Enriched categories for upregulated genes (red)  
 1102 (GO biological process) are characterized by activation of transcription and early developmental non-  
 1103 neuronal processes. **(E).** Heatmaps showing inverse correlation between H3K27me3 (black) and

1104 expression levels (red). **(F)**. Heat maps showing genome wide abundance of H3K27me3, H3K4me3 and  
1105 H3K9me3 at 8 months in *DatCreEed<sup>wt/wt</sup>* (WT) and *DatCreEed<sup>fl/fl</sup>* (KO) at 10kb upstream and  
1106 downstream of TSS at individual genes ranked by H3K27me3 abundance in the WT. **(G)**. Volcano plot  
1107 showing differentially regulated genes in isolated mCHERRY<sup>+</sup>-nuclei from *DatCreEed<sup>fl/fl</sup>* ventral  
1108 midbrain. Number of upregulated and downregulated genes are indicated above the plot, with the  
1109 number of H3K27me3<sup>+</sup>-genes within brackets. Examples of upregulated genes that are PRC2 targets  
1110 in *DatCreEed<sup>wt/wt</sup>* mDA neurons are labelled on the right side of the plot. Examples of downregulated  
1111 mDA-identity genes are labelled on the left side of the plot. **(H)**. Enriched categories for upregulated  
1112 genes (red) (GO biological process) are characterized by activation of transcription and early  
1113 developmental non-neuronal processes, whereas downregulated genes (green) show enrichment for  
1114 ventral midbrain categories (Up in Allen Brain Atlas, as calculated by Enrichr). **(I)**. Heat maps showing  
1115 abundance of H3K27me3, H3K4me3 and H3K9me3 at genes upregulated in 8 months *DatCreEed<sup>fl/fl</sup>*  
1116 (KO) at 10kb upstream and downstream of TSS at individual genes ranked by H3K27me3 abundance  
1117 in the WT. **(J)**. Heatmap profiles of average H3K27me3, H3K4me3 and H3K9me3 RPKMs  $\pm$ 10kb around  
1118 TSS of genes per defined chromatin states (denoted as K4, K27, K4/K27, K9/K27 and K4/K9/K27) in 8-  
1119 month *DatCreEed<sup>wt/wt</sup>* (WT) and how these states are resolved in the *DatCreEed<sup>fl/fl</sup>* (KO) mDA-nuclei.  
1120 Below each chromatin state, IGV-tracks exemplify how the chromatin states compare at  
1121 representative genes between WT and KO. **(K)**. Enrichment/depletion of chromatin states for  
1122 upregulated genes in *DatCreEed<sup>fl/fl</sup>* mCHERRY<sup>+</sup>-cells at 8months. **(L)**. Volcano plot as in **B** showing  
1123 differentially regulated genes belonging to H3K4me3/H3K27me3 (green) or H3K9me3/H3K27me3  
1124 (red) chromatin states in WT cells. **(M)**. Violin plot showing absolute expression level ( $\log_2(\text{RPKM}+1)$ )  
1125 of upregulated genes in KO mDA-cells belonging to K4/K27 or K9/K27 chromatin states in 8-month WT  
1126 mDA-cells. **(N)**. Difference ( $\Delta$ ) in gene expression between WT and KO of genes belonging to K4/K27  
1127 or K9/K27. Student's t-test. **(O)**. Genes belonging to the K9/K27 chromatin state and upregulated in  
1128 KO mDA-cells at 8-months have reduced K9 surrounding TSS already at 4 months despite no increased  
1129 expression at 4 months.

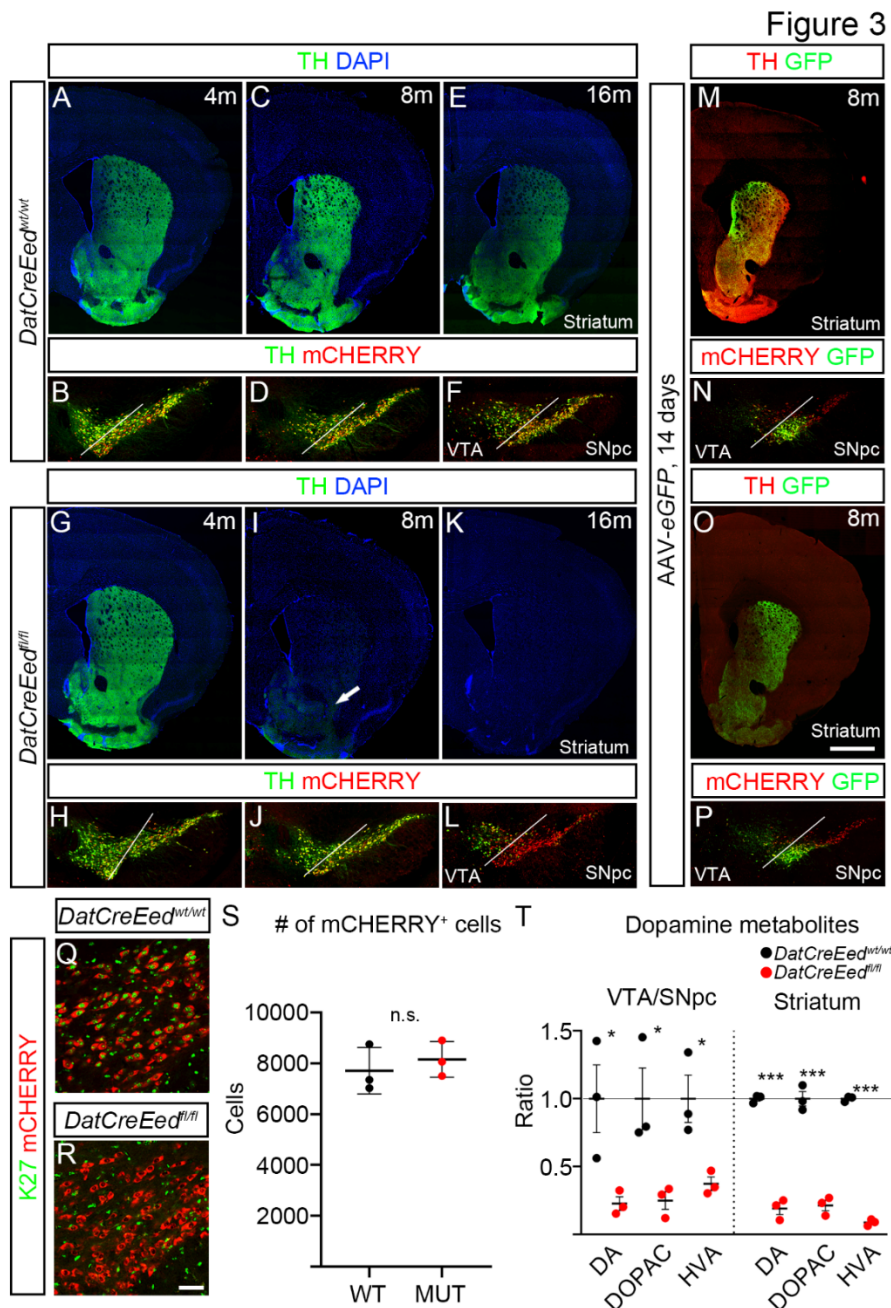

1130

1131

**Figure 3. Reduced levels of TH and dopamine metabolites in striatum and midbrain upon**

**inactivation of PRC2 (A).** TH immunostaining in the striatum of *DatCreEed*<sup>wt/wt</sup>-mice at 4 months. (B).

TH immunostaining and mCHERRY-fluorescence in the ventral midbrain of *DatCreEed*<sup>wt/wt</sup>-mice at 4

months. (C). TH immunostaining in the striatum of *DatCreEed*<sup>wt/wt</sup>-mice at 8 months. (D). TH

immunostaining and mCHERRY-fluorescence in the ventral midbrain of *DatCreEed*<sup>wt/wt</sup>-mice at 8

months. (E). TH immunostaining in the striatum of *DatCreEed*<sup>wt/wt</sup>-mice at 16 months. (F). TH

immunostaining and mCHERRY-fluorescence in the ventral midbrain of *DatCreEed*<sup>wt/wt</sup>-mice at 16

1138 months. **(G)**. TH immunostaining in the striatum of *DatCreEed<sup>fl/fl</sup>*-mice at 4 months. **(H)**. TH  
1139 immunostaining and mCHERRY-fluorescence in the ventral midbrain of *DatCreEed<sup>fl/fl</sup>*-mice at 4  
1140 months. **(I)**. Reduced TH immunostaining in the striatum of *DatCreEed<sup>fl/fl</sup>*-mice at 8 months. Arrow  
1141 indicates reduced albeit detectable TH immunostaining in the Nucleus Accumbens. **(J)**. TH  
1142 immunostaining and mCHERRY-fluorescence in the ventral midbrain of *DatCreEed<sup>fl/fl</sup>*-mice at 8  
1143 months. **(K)**. Reduced TH immunostaining in the striatum of *DatCreEed<sup>fl/fl</sup>*-mice at 16 months. **(L)**. TH  
1144 immunostaining and mCHERRY-fluorescence in the ventral midbrain of *DatCreEed<sup>fl/fl</sup>*-mice at 16  
1145 months. **(M)**. Expression of eGFP in striatum of *DatCreEed<sup>wt/wt</sup>*-mice 21days after injection of AAV-  
1146 *eGFP* in ventral midbrain. **(N)**. Site of injection of AAV-*eGFP* in *DatCreEed<sup>wt/wt</sup>*-mice 21 days post-  
1147 injection. **(O)**. Expression of eGFP in striatum of *DatCreEed<sup>fl/fl</sup>*-mice 21days after injection of AAV-*eGFP*  
1148 in ventral midbrain. **(P)**. Site of injection of AAV-*eGFP* in *DatCreEed<sup>fl/fl</sup>*-mice 21 days post-injection. **(Q)**.  
1149 H3K27me3 immunostaining in mCHERRY<sup>+</sup>-cells in SN of 8 months *DatCreEed<sup>wt/wt</sup>*-mice. **(R)**. No  
1150 H3K27me3 immunostaining in mCHERRY<sup>+</sup>-cells in SN of 8 months *DatCreEed<sup>wt/wt</sup>*-mice. **(S)**.  
1151 Quantification of mCHERRY<sup>+</sup>-cells in ventral midbrain of *DatCreEed<sup>wt/wt</sup>*-mice and *DatCreEed<sup>fl/fl</sup>*-mice at  
1152 8 months shows no loss of mCHERRY<sup>+</sup>-cells in the mutant midbrains. **(T)**. Reduced levels of dopamine  
1153 metabolites in the ventral midbrain and striatum of *DatCreEed<sup>fl/fl</sup>*-mice. In **T** \*p<0.05, \*\*\* p<0.001,  
1154 Unpaired t-test with Welch's correction. Scale bar in O: 1000µm, in R: 50µm.

1155  
1156

Figure 4

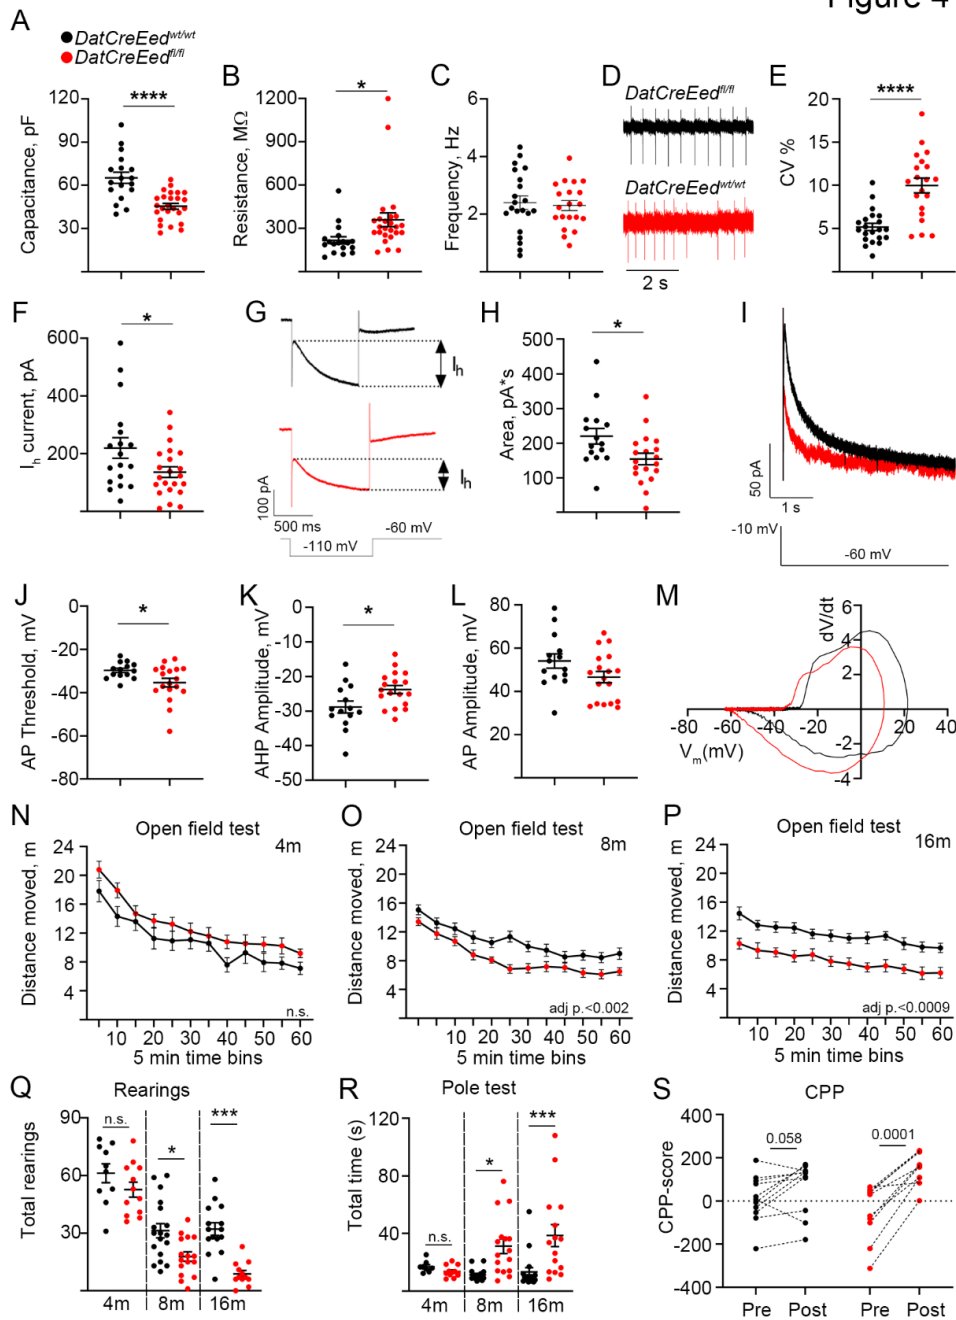

1157

1158

1159 **Figure 4. Altered electrophysiological properties and animal behaviour upon inactivation of PRC2.**

1160 (A). Reduced capacitance in 8-month *DatCreEed<sup>f/f</sup>* mDA neurons. (B). Increased membrane resistance

1161 in 8-month *DatCreEed<sup>f/f</sup>* mDA neurons. (C-E). Increased coefficient of variation of interspike intervals

1162 of autonomous pacemaker currents in 8-month *DatCreEed<sup>f/f</sup>* mDA neurons. (F-G). Decreased

1163 hyperpolarization current ( $I_h$ ) in 8-month *DatCreEed<sup>f/f</sup>* mDA neurons. (H-I). Decreased slow

1164 afterhyperpolarization current in 8-month *DatCreEed<sup>f/f</sup>* mDA neurons. (J-K). Action potential (AP)

1165 threshold is reduced (**J**), whereas afterhyperpolarization is decreased (**K**) in *DatCreEed<sup>fl/fl</sup>* mDA  
1166 neurons. (**L**). AP amplitude was not significantly reduced in *DatCreEed<sup>fl/fl</sup>* mDA neurons. (**M**). Phase  
1167 plot (dV/dt versus  $V_m$ ) of action potential in *DatCreEed<sup>wt/wt</sup>* and *DatCreEed<sup>fl/fl</sup>*-mDA neurons of the  
1168 SNpc. (**N-P**). Open field test at 4 months (**N**), 8 months (**O**) and 16 months (**P**) shows progressive  
1169 decrease in distance moved by *DatCreEed<sup>fl/fl</sup>*-mice. (**Q**). Progressive increase in total time needed for  
1170 *DatCreEed<sup>fl/fl</sup>*-mice to complete the pole test. (**R**). Progressive decrease in number of rearings for  
1171 *DatCreEed<sup>fl/fl</sup>*-mice. (**S**). CPP-score pre and post exposure to cocaine in wild type and mutant mice. In  
1172 **A-M**, the data sets were checked for normality with Shapiro-Wilk test. For normally distributed data  
1173 sets unpaired t-test was used (\* -  $p < 0.05$ , \*\*\*\* -  $p < 0.0005$ ). If the data sets did not pass the normality  
1174 test – Mann-Whitney test was applied. In **N-P**, p-values calculated by Two-way repeated measures  
1175 ANOVA. In **Q-R**, \* $p < 0.05$ , \*\*\* $p < 0.001$  calculated by One-way ANOVA with Tukey's multiple  
1176 comparisons test. In **S** p-values calculated with paired- t-test.

1177  
1178  
1179  
1180  
1181  
1182  
1183



Figure 5



1184  
1185

1186 **Figure 5. *Eed* deficiency in 5HT-neurons results in impaired 5HT-specific gene expression and**

1187 **function. (A).** *In situ* hybridization for *Slc6a4* (*Sert*) taken from the Allen Brain Atlas (mouse.brain-

1188 map.org, image credit: Allen Institute). (B). Immunostaining of H3K27me3 in mCHERRY<sup>+</sup>-5HT-neurons

1189 in the dorsal raphe of *SertCreEed<sup>wt/wt</sup>*-mice. (C). Lack of H3K27me3 immunostaining in mCHERRY<sup>+</sup>-5HT-

1190 neurons in the dorsal raphe of *SertCreEed<sup>fl/fl</sup>*-mice. (D-F). TPH2 immunostaining localized in mCHERRY<sup>+</sup>

1191 5HT-neurons in the dorsal raphe of *SertCreEed<sup>wt/wt</sup>*-mice aged 4 months (D), 8 months (E) and 16

1192 months (F). (G-J). Progressive loss of TPH2 in 5HT-neurons in the dorsal raphe of *SertCreEed<sup>fl/fl</sup>*-mice

1193 aged 4 months (G), 8months (H) and 16 months (I). (J). Volcano plot showing differentially regulated



1194 genes in isolated mCHERRY<sup>+</sup>-nuclei from *SertCreEed<sup>fl/fl</sup>* ventral midbrain. Number of upregulated and  
1195 downregulated genes are indicated above the plot, with the number of H3K27me3<sup>+</sup>-genes within  
1196 brackets. Examples of upregulated genes that are PRC2 targets in *SertCreEed<sup>wt/wt</sup>* mDA neurons are  
1197 labelled on the right side of the plot. Examples of downregulated 5HT-identity genes are labelled on  
1198 the left side of the plot. **(K)**. Enriched categories for upregulated genes (red) (GO biological process)  
1199 are characterized by activation of transcription and early developmental non-neuronal processes,  
1200 whereas downregulated genes (green) show enrichment for raphe categories (Up in Allen Brain Atlas,  
1201 as calculated in Enrichr). **(L)**. Reduced levels of serotonin metabolites in the raphe and prefrontal  
1202 cortex (PFC) of *SertCreEed<sup>fl/fl</sup>*-mice. **(M)**. Heatmap of time spent in indicated areas in the elevated plus  
1203 maze (EPM) for *SertCreEed<sup>wt/wt</sup>*-mice. **(N)**. Heatmap of time spent in indicated areas in the elevated  
1204 plus maze (EPM) for *SertCreEed<sup>fl/fl</sup>*-mice. **(O)**. Increased time spent in open area for *SertCreEed<sup>fl/fl</sup>*-mice  
1205 in the EPM. Unpaired t-test with Welch's correction. **(P)**. Increased number of visits to open area for  
1206 *SertCreEed<sup>fl/fl</sup>*-mice in the EPM. Unpaired t-test with Welch's correction. **(Q)**. Enrichment of  
1207 upregulated genes in *SertCreEed<sup>fl/fl</sup>* mCHERRY<sup>+</sup> nuclei at the different chromatin states. **(R)**. Overlap of  
1208 upregulated genes in *DatCreEed<sup>fl/fl</sup>*-mice and *SertCreEed<sup>fl/fl</sup>*-mice, K27<sup>+</sup> genes indicated in blue. **(S)**.  
1209 Commonly upregulated genes in *DatCreEed<sup>fl/fl</sup>*-mice and *SertCreEed<sup>fl/fl</sup>*-mice are more enriched for the  
1210 K9K/K27 chromatin state than the K4/K27 state. In **L**, **O** and **P** \*p<0.05, \*\*p<0.01, \*\*\* p<0.001,  
1211 Unpaired t-test with Welch's correction. Scale bar in C: 20μm, in I: 200μm.

1212

1213

1214

1215

1216

1217

Figure 6

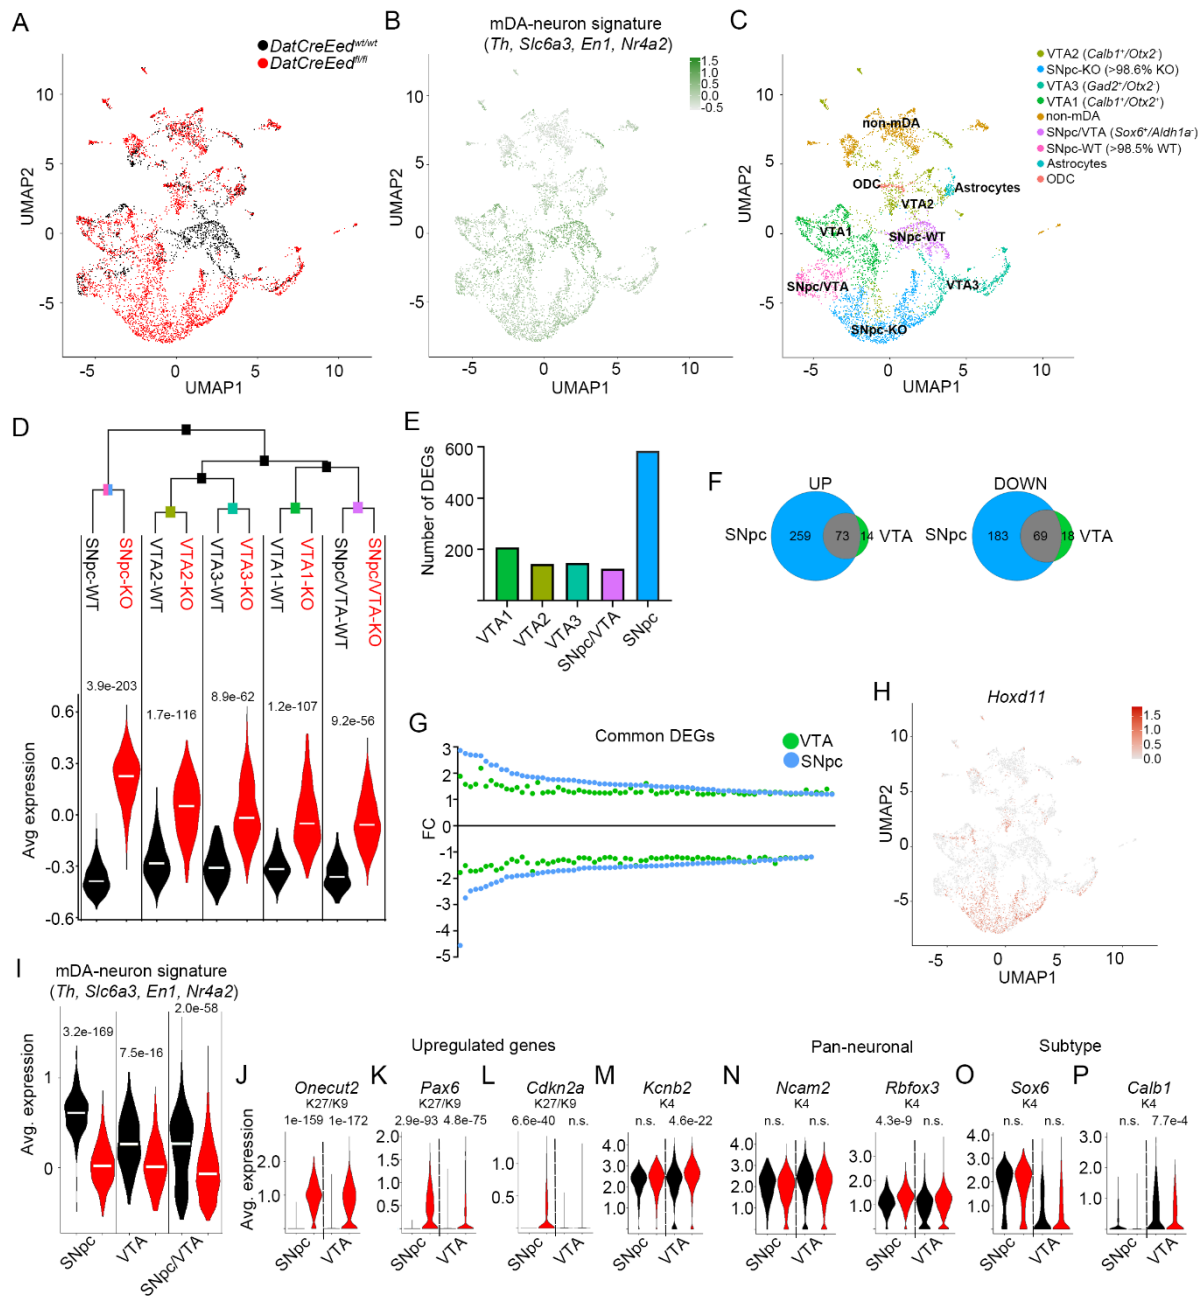

1218

1219 **Figure 6. mDA neurons of the SNpc exhibit selective increased vulnerability to loss of PRC2 activity.**

1220 (A). UMAP showing distribution of wild type (black) and mutant (red) nuclei. (B). Average expression

1221 levels of mDA-identity signature (*Th, Slc6a3, Nr4a2* and *En1*) in sequenced nuclei. (C). Classification of

1222 defined subgroups in sequenced nuclei, in UMAP space. (D). Hierarchical clustering of the mDA-

1223 neuron subgroups defined in (C) based on expression of 2000 most variable genes and composite

1224 expression score of the 25 most upregulated genes in the KO, plotted for the indicated groups. Black

1225 text denotes WT-nuclei and red text denotes KO-nuclei. (E). Number of differentially expressed genes

1226 (DEGs) in *DatCreEed<sup>fl/fl</sup>* mCHERRY<sup>+</sup> single nuclei of the different mDA-neuron groups according to Fig.  
1227 6C. (F). Venn diagram of upregulated (UP) and downregulated (DOWN) genes in *DatCreEed<sup>fl/fl</sup>*  
1228 mCHERRY<sup>+</sup> single nuclei in combined VTA and SNpc. (G). Fold-change of gene expression (FC) for the  
1229 DEGs common between VTA and SNpc for mutant vs. wild type. To put up- and downregulated genes  
1230 on similar scales, the inverted fold-change (-1/FC) is plotted for downregulated genes. (H). UMAP  
1231 visualization of *Hoxd11* expression in sequenced nuclei. (I). Average expression of mDA-neuronal  
1232 signature in wild type (black) and mutant (red) nuclei in groups defined in (C), with VTA representing  
1233 VTA1+VTA2+VTA3. (J-M). Violin plots exemplifying genes upregulated in both mutant SNpc and VTA  
1234 (J), of genes more upregulated in mutant SNpc than in mutant VTA (K), of genes only upregulated in  
1235 mutant SNpc and not in the VTA (L) of genes only upregulated in mutant VTA and not in SNpc (M). (N-  
1236 P). Violin plots of pan-neuronal markers in wild type and mutant SNpc and VTA nuclei (N), of the SNpc-  
1237 marker *Sox6* in wild type and mutant SNpc and VTA nuclei (O), of the VTA-marker *Calb1* in wild type  
1238 and mutant SNpc and VTA nuclei (P). Wilcoxon Rank Sum test, with Bonferroni corrections for adjusted  
1239 p-values. Adjusted p-values are included in panels D and I-P.

1240

## 1241 References

- 1242 1. J. Holmberg, T. Perlmann, Maintaining differentiated cellular identity. *Nat Rev Genet* **13**,  
1243 429-439 (2012).
- 1244 2. E. S. Deneris, O. Hobert, Maintenance of postmitotic neuronal cell identity. *Nat Neurosci* **17**,  
1245 899-907 (2014).
- 1246 3. F. Bantignies, G. Cavalli, Cellular memory and dynamic regulation of polycomb group  
1247 proteins. *Curr Opin Cell Biol* **18**, 275-283 (2006).
- 1248 4. L. Di Croce, K. Helin, Transcriptional regulation by Polycomb group proteins. *Nat Struct Mol*  
1249 *Biol* **20**, 1147-1155 (2013).
- 1250 5. M. Corley, K. L. Kroll, The roles and regulation of Polycomb complexes in neural  
1251 development. *Cell Tissue Res* **359**, 65-85 (2015).
- 1252 6. M. von Schimmelmann, P. A. Feinberg, J. M. Sullivan, S. M. Ku, A. Badimon, M. K. Duff, Z.  
1253 Wang, A. Lachmann, S. Dewell, A. Ma'ayan, M. H. Han, A. Tarakhovsky, A. Schaefer,  
1254 Polycomb repressive complex 2 (PRC2) silences genes responsible for neurodegeneration.  
1255 *Nat Neurosci* **19**, 1321-1330 (2016).
- 1256 7. M. Tsuboi, Y. Hirabayashi, Y. Gotoh, Diverse gene regulatory mechanisms mediated by  
1257 Polycomb group proteins during neural development. *Curr Opin Neurobiol* **59**, 164-173  
1258 (2019).
- 1259 8. I. Wever, C. Wagemans, M. P. Smidt, EZH2 Is Essential for Fate Determination in the  
1260 Mammalian Isthmic Area. *Front Mol Neurosci* **12**, 76 (2019).

- 1261 9. F. Mohn, M. Weber, M. Rebhan, T. C. Roloff, J. Richter, M. B. Stadler, M. Bibel, D. Schubeler,  
1262 Lineage-specific polycomb targets and de novo DNA methylation define restriction and  
1263 potential of neuronal progenitors. *Mol Cell* **30**, 755-766 (2008).
- 1264 10. B. E. Bernstein, T. S. Mikkelsen, X. Xie, M. Kamal, D. J. Huebert, J. Cuff, B. Fry, A. Meissner, M.  
1265 Wernig, K. Plath, R. Jaenisch, A. Wagschal, R. Feil, S. L. Schreiber, E. S. Lander, A bivalent  
1266 chromatin structure marks key developmental genes in embryonic stem cells. *Cell* **125**, 315-  
1267 326 (2006).
- 1268 11. E. J. Nestler, C. J. Pena, M. Kundakovic, A. Mitchell, S. Akbarian, Epigenetic Basis of Mental  
1269 Illness. *Neuroscientist* **22**, 447-463 (2016).
- 1270 12. E. Sodersten, M. Feyder, M. Lerdrup, A. L. Gomes, H. Kryh, G. Spigolon, J. Caboche, G. Fisone,  
1271 K. Hansen, Dopamine signaling leads to loss of Polycomb repression and aberrant gene  
1272 activation in experimental parkinsonism. *PLoS Genet* **10**, e1004574 (2014).
- 1273 13. J. Li, R. P. Hart, E. M. Mallimo, M. R. Swerdel, A. W. Kusnecov, K. Herrup, EZH2-mediated  
1274 H3K27 trimethylation mediates neurodegeneration in ataxia-telangiectasia. *Nat Neurosci* **16**,  
1275 1745-1753 (2013).
- 1276 14. I. S. Seong, J. M. Woda, J. J. Song, A. Lloret, P. D. Abeyrathne, C. J. Woo, G. Gregory, J. M.  
1277 Lee, V. C. Wheeler, T. Walz, R. E. Kingston, J. F. Gusella, R. A. Conlon, M. E. MacDonald,  
1278 Huntingtin facilitates polycomb repressive complex 2. *Human molecular genetics* **19**, 573-  
1279 583 (2010).
- 1280 15. V. Vialou, J. Feng, A. J. Robison, E. J. Nestler, Epigenetic mechanisms of depression and  
1281 antidepressant action. *Annu Rev Pharmacol Toxicol* **53**, 59-87 (2013).
- 1282 16. A. Munoz, A. Lopez-Lopez, C. M. Labandeira, J. L. Labandeira-Garcia, Interactions Between  
1283 the Serotonergic and Other Neurotransmitter Systems in the Basal Ganglia: Role in  
1284 Parkinson's Disease and Adverse Effects of L-DOPA. *Front Neuroanat* **14**, 26 (2020).
- 1285 17. H. Rekaik, F. X. Blaudin de The, J. Fuchs, O. Massiani-Beaudoin, A. Prochiantz, R. L. Joshi,  
1286 Engrailed Homeoprotein Protects Mesencephalic Dopaminergic Neurons from Oxidative  
1287 Stress. *Cell Rep* **13**, 242-250 (2015).
- 1288 18. D. Nicetto, K. S. Zaret, Role of H3K9me3 heterochromatin in cell identity establishment and  
1289 maintenance. *Curr Opin Genet Dev* **55**, 1-10 (2019).
- 1290 19. A. Schaefer, S. C. Sampath, A. Intrator, A. Min, T. S. Gertler, D. J. Surmeier, A. Tarakhovsky, P.  
1291 Greengard, Control of cognition and adaptive behavior by the GLP/G9a epigenetic  
1292 suppressor complex. *Neuron* **64**, 678-691 (2009).
- 1293 20. E. Sodersten, K. Toskas, V. Rraklli, K. Tiklova, A. K. Bjorklund, M. Ringner, T. Perlmann, J.  
1294 Holmberg, A comprehensive map coupling histone modifications with gene regulation in  
1295 adult dopaminergic and serotonergic neurons. *Nat Commun* **9**, 1226 (2018).
- 1296 21. R. Margueron, N. Justin, K. Ohno, M. L. Sharpe, J. Son, W. J. Drury, 3rd, P. Voigt, S. R. Martin,  
1297 W. R. Taylor, V. De Marco, V. Pirrotta, D. Reinberg, S. J. Gambin, Role of the polycomb  
1298 protein EED in the propagation of repressive histone marks. *Nature* **461**, 762-767 (2009).
- 1299 22. H. Xie, J. Xu, J. H. Hsu, M. Nguyen, Y. Fujiwara, C. Peng, S. H. Orkin, Polycomb repressive  
1300 complex 2 regulates normal hematopoietic stem cell function in a developmental-stage-  
1301 specific manner. *Cell Stem Cell* **14**, 68-80 (2014).
- 1302 23. M. I. Ekstrand, M. Terzioglu, D. Galter, S. Zhu, C. Hofstetter, E. Lindqvist, S. Thams, A.  
1303 Bergstrand, F. S. Hansson, A. Trifunovic, B. Hoffer, S. Cullheim, A. H. Mohammed, L. Olson, N.  
1304 G. Larsson, Progressive parkinsonism in mice with respiratory-chain-deficient dopamine  
1305 neurons. *Proc Natl Acad Sci U S A* **104**, 1325-1330 (2007).
- 1306 24. E. Y. Chen, C. M. Tan, Y. Kou, Q. Duan, Z. Wang, G. V. Meirelles, N. R. Clark, A. Ma'ayan,  
1307 Enrichr: interactive and collaborative HTML5 gene list enrichment analysis tool. *BMC*  
1308 *Bioinformatics* **14**, 128 (2013).
- 1309 25. M. V. Kuleshov, M. R. Jones, A. D. Rouillard, N. F. Fernandez, Q. Duan, Z. Wang, S. Koplev, S.  
1310 L. Jenkins, K. M. Jagodnik, A. Lachmann, M. G. McDermott, C. D. Monteiro, G. W. Gundersen,

- 1311 A. Ma'ayan, Enrichr: a comprehensive gene set enrichment analysis web server 2016 update.  
1312 *Nucleic Acids Res* **44**, W90-97 (2016).
- 1313 26. S. W. Oh, J. A. Harris, L. Ng, B. Winslow, N. Cain, S. Mihalas, Q. Wang, C. Lau, L. Kuan, A. M.  
1314 Henry, M. T. Mortrud, B. Ouellette, T. N. Nguyen, S. A. Sorensen, C. R. Slaughterbeck, W.  
1315 Wakeman, Y. Li, D. Feng, A. Ho, E. Nicholas, K. E. Hirokawa, P. Bohn, K. M. Joines, H. Peng, M.  
1316 J. Hawrylycz, J. W. Phillips, J. G. Hohmann, P. Wohnoutka, C. R. Gerfen, C. Koch, A. Bernard,  
1317 C. Dang, A. R. Jones, H. Zeng, A mesoscale connectome of the mouse brain. *Nature* **508**, 207-  
1318 214 (2014).
- 1319 27. S. P. Brooks, S. B. Dunnett, Tests to assess motor phenotype in mice: a user's guide. *Nat Rev*  
1320 *Neurosci* **10**, 519-529 (2009).
- 1321 28. A. L. Collins, B. T. Saunders, Heterogeneity in striatal dopamine circuits: Form and function in  
1322 dynamic reward seeking. *J Neurosci Res* **98**, 1046-1069 (2020).
- 1323 29. X. Zhuang, J. Masson, J. A. Gingrich, S. Rayport, R. Hen, Targeted gene expression in  
1324 dopamine and serotonin neurons of the mouse brain. *J Neurosci Methods* **143**, 27-32 (2005).
- 1325 30. S. Pellow, P. Chopin, S. E. File, M. Briley, Validation of open:closed arm entries in an elevated  
1326 plus-maze as a measure of anxiety in the rat. *J Neurosci Methods* **14**, 149-167 (1985).
- 1327 31. V. Mosienko, B. Bert, D. Beis, S. Matthes, H. Fink, M. Bader, N. Alenina, Exaggerated  
1328 aggression and decreased anxiety in mice deficient in brain serotonin. *Transl Psychiatry* **2**,  
1329 e122 (2012).
- 1330 32. M. S. Whitney, A. M. Shemery, A. M. Yaw, L. J. Donovan, J. D. Glass, E. S. Deneris, Adult Brain  
1331 Serotonin Deficiency Causes Hyperactivity, Circadian Disruption, and Elimination of Siestas. *J*  
1332 *Neurosci* **36**, 9828-9842 (2016).
- 1333 33. J. F. Poulin, Z. Gaertner, O. A. Moreno-Ramos, R. Awatramani, Classification of Midbrain  
1334 Dopamine Neurons Using Single-Cell Gene Expression Profiling Approaches. *Trends Neurosci*  
1335 **43**, 155-169 (2020).
- 1336 34. Y. Hirabayashi, N. Suzki, M. Tsuboi, T. A. Endo, T. Toyoda, J. Shinga, H. Koseki, M. Vidal, Y.  
1337 Gotoh, Polycomb limits the neurogenic competence of neural precursor cells to promote  
1338 astrogenic fate transition. *Neuron* **63**, 600-613 (2009).
- 1339 35. I. Wever, L. von Oerthel, C. Wagemans, M. P. Smidt, EZH2 Influences mdDA Neuronal  
1340 Differentiation, Maintenance and Survival. *Front Mol Neurosci* **11**, 491 (2018).
- 1341 36. T. T. Lu, S. Heyne, E. Dror, E. Casas, L. Leonhardt, T. Boenke, C. H. Yang, Sagar, L. Arrigoni, K.  
1342 Dalgaard, R. Teperino, L. Enders, M. Selvaraj, M. Ruf, S. J. Raja, H. Xie, U. Boenisch, S. H.  
1343 Orkin, F. C. Lynn, B. G. Hoffman, D. Grun, T. Vavouri, A. M. Lempradl, J. A. Pospisilik, The  
1344 Polycomb-Dependent Epigenome Controls beta Cell Dysfunction, Dedifferentiation, and  
1345 Diabetes. *Cell Metab* **27**, 1294-1308 e1297 (2018).
- 1346 37. S. L. Commerford, A. L. Carsten, E. P. Cronkite, Histone turnover within nonproliferating  
1347 cells. *Proc Natl Acad Sci U S A* **79**, 1163-1165 (1982).
- 1348 38. I. Maze, W. Wenderski, K. M. Noh, R. C. Bagot, N. Tzavaras, I. Purushothaman, S. J. Elsasser,  
1349 Y. Guo, C. Ionete, Y. L. Hurd, C. A. Tamminga, T. Halene, L. Farrelly, A. A. Soshnev, D. Wen, S.  
1350 Ruff, M. R. Birtwistle, S. Akbarian, B. A. Buchholz, R. D. Blitzer, E. J. Nestler, Z. F. Yuan, B. A.  
1351 Garcia, L. Shen, H. Molina, C. D. Allis, Critical Role of Histone Turnover in Neuronal  
1352 Transcription and Plasticity. *Neuron* **87**, 77-94 (2015).
- 1353 39. U. Jadhav, K. Nalapareddy, M. Saxena, N. K. O'Neill, L. Pinello, G. C. Yuan, S. H. Orkin, R. A.  
1354 Shivdasani, Acquired Tissue-Specific Promoter Bivalency Is a Basis for PRC2 Necessity in  
1355 Adult Cells. *Cell* **165**, 1389-1400 (2016).
- 1356 40. R. N. Shah, A. T. Grzybowski, J. Elias, Z. Chen, T. Hattori, C. C. Lechner, P. W. Lewis, S. Koide,  
1357 B. Fierz, A. J. Ruthenburg, Re-evaluating the role of nucleosomal bivalency in early  
1358 development. 2021.2009.2009.458948 (2021).
- 1359 41. J. Boros, N. Arnoult, V. Stroobant, J. F. Collet, A. Decottignies, Polycomb repressive complex  
1360 2 and H3K27me3 cooperate with H3K9 methylation to maintain heterochromatin protein  
1361 1alpha at chromatin. *Mol Cell Biol* **34**, 3662-3674 (2014).



- 1362 42. J. J. Montero, I. Lopez-Silanes, D. Megias, F. F. M, A. Castells-Garcia, M. A. Blasco, TERRA  
1363 recruitment of polycomb to telomeres is essential for histone trimethylation marks at  
1364 telomeric heterochromatin. *Nat Commun* **9**, 1548 (2018).
- 1365 43. C. C. de la Cruz, A. Kirmizis, M. D. Simon, K. Isono, H. Koseki, B. Panning, The polycomb group  
1366 protein SUZ12 regulates histone H3 lysine 9 methylation and HP1 alpha distribution.  
1367 *Chromosome Res* **15**, 299-314 (2007).
- 1368 44. S. Y. Branch, C. Chen, R. Sharma, J. D. Lechleiter, S. Li, M. J. Beckstead, Dopaminergic  
1369 Neurons Exhibit an Age-Dependent Decline in Electrophysiological Parameters in the  
1370 MitoPark Mouse Model of Parkinson's Disease. *J Neurosci* **36**, 4026-4037 (2016).
- 1371 45. L. Sonnier, G. Le Pen, A. Hartmann, J. C. Bizot, F. Trovero, M. O. Krebs, A. Prochiantz,  
1372 Progressive loss of dopaminergic neurons in the ventral midbrain of adult mice heterozygote  
1373 for Engrailed1. *J Neurosci* **27**, 1063-1071 (2007).
- 1374 46. M. Hupe, M. X. Li, K. Gertow Gillner, R. H. Adams, J. M. Stenman, Evaluation of TRAP-  
1375 sequencing technology with a versatile conditional mouse model. *Nucleic Acids Res* **42**, e14  
1376 (2014).
- 1377 47. E. A. Susaki, K. Tainaka, D. Perrin, H. Yukinaga, A. Kuno, H. R. Ueda, Advanced CUBIC  
1378 protocols for whole-brain and whole-body clearing and imaging. *Nat Protoc* **10**, 1709-1727  
1379 (2015).
- 1380 48. D. Calvigioni, Z. Máté, J. Fuzik, F. Girach, M. D. Zhang, A. Varro, J. Beiersdorf, C. Schwindling,  
1381 Y. Yanagawa, G. J. Dockray, C. J. McBain, T. Hökfelt, G. Szabó, E. Keimpema, T. Harkany,  
1382 Functional Differentiation of Cholecystokinin-Containing Interneurons Destined for the  
1383 Cerebral Cortex. *Cereb Cortex* **27**, 2453-2468 (2017).
- 1384 49. E. Södersten, K. Toskas, V. Rraklli, K. Tiklova, K. Björklund Å, M. Ringnér, T. Perlmann, J.  
1385 Holmberg, A comprehensive map coupling histone modifications with gene regulation in  
1386 adult dopaminergic and serotonergic neurons. *Nat Commun* **9**, 1226 (2018).
- 1387 50. S. Picelli, O. R. Faridani, A. K. Bjorklund, G. Winberg, S. Sagasser, R. Sandberg, Full-length  
1388 RNA-seq from single cells using Smart-seq2. *Nat Protoc* **9**, 171-181 (2014).
- 1389 51. A. Dobin, C. A. Davis, F. Schlesinger, J. Drenkow, C. Zaleski, S. Jha, P. Batut, M. Chaisson, T. R.  
1390 Gingeras, STAR: ultrafast universal RNA-seq aligner. *Bioinformatics* **29**, 15-21 (2013).
- 1391 52. D. Ramskold, E. T. Wang, C. B. Burge, R. Sandberg, An abundance of ubiquitously expressed  
1392 genes revealed by tissue transcriptome sequence data. *PLoS Comput Biol* **5**, e1000598  
1393 (2009).
- 1394 53. M. I. Love, W. Huber, S. Anders, Moderated estimation of fold change and dispersion for  
1395 RNA-seq data with DESeq2. *Genome Biol* **15**, 550 (2014).
- 1396 54. J. Brind'Amour, S. Liu, M. Hudson, C. Chen, M. M. Karimi, M. C. Lorincz, An ultra-low-input  
1397 native ChIP-seq protocol for genome-wide profiling of rare cell populations. *Nat Commun* **6**,  
1398 6033 (2015).
- 1399 55. B. Langmead, S. L. Salzberg, Fast gapped-read alignment with Bowtie 2. *Nat Methods* **9**, 357-  
1400 359 (2012).
- 1401 56. F. Ramirez, D. P. Ryan, B. Gruning, V. Bhardwaj, F. Kilpert, A. S. Richter, S. Heyne, F. Dundar,  
1402 T. Manke, deepTools2: a next generation web server for deep-sequencing data analysis.  
1403 *Nucleic Acids Res* **44**, W160-165 (2016).
- 1404 57. A. T. Lun, G. K. Smyth, csaw: a Bioconductor package for differential binding analysis of ChIP-  
1405 seq data using sliding windows. *Nucleic Acids Res* **44**, e45 (2016).
- 1406 58. K. E. Hubbard, A. Wells, T. S. Owens, M. Tagen, C. H. Fraga, C. F. Stewart, Determination of  
1407 dopamine, serotonin, and their metabolites in pediatric cerebrospinal fluid by isocratic high  
1408 performance liquid chromatography coupled with electrochemical detection. *Biomedical  
1409 chromatography : BMC* **24**, 626-631 (2010).
- 1410 59. L. Yang, M. F. Beal, Determination of neurotransmitter levels in models of Parkinson's  
1411 disease by HPLC-ECD. *Methods in molecular biology* **793**, 401-415 (2011).

- 1412 60. R. D. Porsolt, M. Le Pichon, M. Jalfre, Depression: a new animal model sensitive to  
1413 antidepressant treatments. *Nature* **266**, 730-732 (1977).  
1414 61. Z. Gu, R. Eils, M. Schlesner, Complex heatmaps reveal patterns and correlations in  
1415 multidimensional genomic data. *Bioinformatics* **32**, 2847-2849 (2016).  
1416
